1     **A selective LIS1 requirement for mitotic spindle assembly discriminates**  
2             **distinct T-cell division mechanisms within the T-cell lineage**

3

4

5     Jérémy Argenty<sup>1</sup>, Nelly Rouquié<sup>1</sup>, Cyrielle Bories<sup>1</sup>, Suzanne Mélique<sup>1</sup>, Valérie Duplan<sup>1</sup>,  
6     Abdelhadi Saoudi<sup>1</sup>, Nicolas Fazilleau<sup>1</sup>, Renaud Lesourne<sup>1</sup>

7

8     <sup>1</sup> Toulouse Institute for Infectious and Inflammatory Diseases (Infinity), INSERM UMR1291,  
9     CNRS UMR5051, University Toulouse III, Toulouse, France.

10

11     Correspondence should be addressed to R.L.

12     Email: [renaud.lesourne@inserm.fr](mailto:renaud.lesourne@inserm.fr)

13

14 **Abstract**

15

16 The ability to proliferate is a common feature of most T-cell populations. However,  
17 proliferation follows different cell-cycle dynamics and is coupled to different functional  
18 outcomes according to T-cell subsets. Whether the mitotic machineries supporting these  
19 qualitatively distinct proliferative responses are identical remains unknown. Here, we show that  
20 disruption of the microtubule-associated protein LIS1 leads to proliferative defects associated  
21 with a blockade of T-cell development after  $\beta$ -selection and of peripheral CD4<sup>+</sup> T cell  
22 expansion after antigen priming. In contrast, cell divisions in CD8<sup>+</sup> T cells occurred  
23 independently of LIS1 following T-cell antigen receptor stimulation, although LIS1 was  
24 required for proliferation elicited by pharmacological activation. In thymocytes and CD4<sup>+</sup> T  
25 cells, LIS1-deficiency did not affect signaling events leading to activation but led to an  
26 interruption of proliferation after the initial round of division and to p53-induced cell death.  
27 Proliferative defects resulted from a mitotic failure, characterized by the presence of extra-  
28 centrosomes and the formation of multipolar spindles, causing abnormal chromosomes  
29 congression during metaphase and separation during telophase. LIS1 was required to stabilize  
30 dynein/dynactin complexes, which promote chromosome attachment to mitotic spindles and  
31 ensure centrosome integrity. Together, these results suggest that proliferative responses are  
32 supported by distinct mitotic machineries across T-cell subsets.

33

34

35

36

37

38

## 39 **Introduction**

40

41 Proliferation enables the expansion, differentiation and maintenance of T cells at different  
42 stages of their life cycle. It is required for the rapid growth of antigen specific T cells, which is  
43 important for efficient control of infection. In this context, the initiation of cell division is  
44 primarily driven by signals triggered by the T-cell antigen receptor (TCR), which recognizes  
45 self or foreign peptides bound to the major histocompatibility complex (pMHC) at the surface  
46 of antigen presenting cells (APCs). Proliferation is also important during T cell development  
47 as it enables the expansion of immature CD4-CD8- thymocytes (referred to as double-negative  
48 [DN] thymocytes) that have successfully rearranged the TCR  $\beta$ -chain and their differentiation  
49 into CD4+CD8+ thymocytes (referred to as double-positive [DP] thymocytes) (1, 2). At these  
50 stages, proliferation is mainly driven by coordinated signaling events triggered by the pre-TCR  
51 and by the Notch receptor (3, 4). Slow proliferative events are also induced in peripheral T cells  
52 to maintain a functional and diversified pool of lymphocytes. Such homeostatic proliferation is  
53 triggered in response to TCR stimulation by self-pMHC ligands and to specific cytokines (5).

54

55 CD4+ T helper cells and CD8+ cytotoxic T cells harbor different proliferative characteristics  
56 in response to TCR stimulation. CD4+ T cells require repeated TCR stimulation to efficiently  
57 divide and show a relatively restricted expansion rate following antigen priming, while CD8+  
58 T cells divide rapidly after single TCR stimulation (6, 7). Cell division is associated to the  
59 acquisition of effector function in CD8+ T cells (8, 9). The fate decision between the effector  
60 and memory lineages in CD8+ T cells has been proposed to occur as early as the first round of  
61 division through asymmetric divisions (9), which enables the unequal partitioning of cell fate  
62 determinants in daughter cells (8). The role of cell division in the acquisition of CD4+ T cells  
63 effector function has been controversial (10, 11). Asymmetric divisions were also reported in

64 CD4<sup>+</sup> T cells (12, 13), but the contribution of such processes to T helper lineage diversification,  
65 which primarily depends on cytokine stimuli, remains also debated (14). Together, these  
66 findings suggest that different cell division dynamics and organization might govern  
67 proliferation in CD4<sup>+</sup> and CD8<sup>+</sup> T cells to ensure different functional outcomes. Whether the  
68 mitotic machinery supporting these qualitatively distinct proliferative responses are identical is  
69 unknown.

70

71 Lissencephaly gene 1 (LIS1, also known as PAFAHB1) is a dynein-binding protein which has  
72 important function during brain development (15). LIS1 is involved in the proliferation and  
73 migration of neural and hematopoietic stem cells (16-18). It binds to the motor protein complex  
74 dynein and regulates the dynamic of its interaction with microtubules (15, 19, 20), as well as  
75 its ability to form active complex with the multimeric protein complex dynactin (21-23). Those  
76 complexes are required for the long transport of cargos toward the minus end of microtubules  
77 (24-27) and are important for a wide variety of cellular processes, including the accumulation  
78 of  $\gamma$ -tubulin at the centrosome (28, 29) and the efficient formation of mitotic spindle poles  
79 during metaphases (30). Recently, we identified LIS1 as a binding partner of the T-cell  
80 signaling protein THEMIS (31, 32), which is important for thymocyte positive selection,  
81 suggesting that LIS1 could exhibit signaling function during T-cell development. LIS1 is  
82 required in several cellular models for chromosome congression and segregation during mitosis  
83 and for the establishment of mitotic spindle pole integrity (33). However, the impact of LIS1-  
84 deficiency on cell division varies according to cell types and stimulatory contexts. For example,  
85 LIS1 is essential to symmetric division of neuroepithelial stem cells prior neurogenesis,  
86 whereas LIS1-deficiency has a moderate impact on asymmetric division associated to the  
87 differentiation neuroepithelial stem cells in neural progenitors (16). Previous studies also  
88 suggest that LIS1 is dispensable for the expansion of CD8<sup>+</sup> T cells induced following antigen

89 priming (34). Together, these findings suggest that LIS1 could have stage- or subset-specific  
90 effects on T-cell mitosis, which might discriminate distinct cellular outcomes.

91

92 Here, we selected LIS1 as a candidate molecule to explore whether T-cell proliferative  
93 responses could be supported by distinct mitotic machineries across different T-cell subsets,  
94 such as immature thymocytes as well as CD4<sup>+</sup> and CD8<sup>+</sup> T cells. Using different *Cre* inducible  
95 models, we identified a selective LIS1-requirement for mitosis in thymocytes and peripheral  
96 CD4<sup>+</sup> T cells following  $\beta$ -selection and antigen priming, respectively. In contrast, the  
97 disruption of LIS1 had little impact on CD8<sup>+</sup> T cell proliferation mediated by the TCR. In  
98 thymocytes and CD4<sup>+</sup> T cells, LIS1 deficiency led to a disruption of dynein-dynactin  
99 complexes, which was associated with a loss of centrosome integrity and with the formation of  
100 multipolar spindles. These mitotic abnormalities conducted to abnormal chromosomes  
101 congression and separation during metaphase and telophase, and to aneuploidy and p53 up-  
102 regulation upon cell division. Together, our results suggest that the mechanisms that support  
103 mitosis within the T-cell lineage could vary across T-cell subsets according to the functional  
104 outcomes to which they are coupled.

105 **Results**

106

107 **Lis1 deficiency leads to an early block of T- and B-cell development**

108

109 To evaluate the role of LIS1 during T cell development, we conditionally disrupt *Pafah1b1*, the  
110 gene encoding LIS1, using a Cre recombinase transgene driven by the human *Cd2*, which is  
111 up-regulated in T- and B-cell progenitors (35). Analysis of CD4 and CD8 surface staining in  
112 the thymus shows that the loss of LIS1 in the *Cd2-Cre* model leads to a major block of  
113 thymocyte maturation at the transition from the DN stage to the DP stage, which is associated  
114 with a strong decrease in DP, CD4 and CD8 single-positive [SP] thymocytes numbers but  
115 normal numbers of DN thymocytes (Figure 1A). Numbers of peripheral CD4<sup>+</sup> and CD8<sup>+</sup> T  
116 cells were also dramatically decreased in *Cd2-Cre Lis1<sup>fllox/fllox</sup>* mice compared to that in control  
117 *Lis1<sup>fllox/fllox</sup>* mice (Figure 1 – Figure Supplement 1A). Analysis of CD25 and CD44 surface  
118 staining on DN thymocytes showed that the numbers of DN4 (CD25-CD44<sup>-</sup>) thymocytes were  
119 strongly decreased in LIS1-deficient mice whereas the numbers of DN3 (CD25+CD44<sup>-</sup>) and  
120 DN2 (CD25+CD44<sup>+</sup>) thymocytes were increased, pointing-out a defect at the transition from  
121 the DN3 to the DN4 stages (Figure 1B). The percentages and numbers of thymocyte in each  
122 subsets were comparable to control mice in *Cd2-Cre Lis1<sup>fllox/+</sup>* mice, indicating that LIS1 hemi-  
123 zygote expression is sufficient to promote T-cell development (Figure 1 – Figure Supplement  
124 1B). Lower numbers of B cells were also detected in LIS1-deficient mice (Figure 1 – Figure  
125 Supplement 1A). Analysis of B cell development in the bone marrow indicates a strong  
126 decrease of the numbers of B220<sup>+</sup>CD19<sup>+</sup> pro-B (IgM-c-kit<sup>+</sup>), pre-B (IgM-c-kit<sup>-</sup>) and immature  
127 B cells (IgM+c-kit<sup>-</sup>), whereas numbers of pre-pro-B cells (B220+CD19<sup>-</sup>) were normal,  
128 suggesting a defect of maturation of pre-pro-B cells into pro-B cells (Figure 1 – Figure

129 Supplement 1C). Together, these data indicate that LIS1 is essential for early stages of T- and  
130 B-cell development.

131

### 132 **LIS1 is required for thymocyte proliferation after the $\beta$ -selection checkpoint**

133

134 One critical developmental step at the DN3 to DN4 transition is the formation of a functional  
135 TCR  $\beta$  chain, which associates with the pT $\alpha$  chain upon successful rearrangement to form the  
136 pre-TCR. Pre-TCR formation triggers signaling events which lead to the up-regulation of CD5  
137 and, together with Notch and the IL-7 receptor (IL-7R) stimulation, to the initiation of several  
138 division cycles and to further maturation of thymocytes into DN4 thymocytes (1, 2, 4, 36, 37).  
139 The percentages of DN3 thymocytes that express the TCR $\beta$  chain and CD27, a cell surface  
140 maker of the  $\beta$ -selection checkpoint (38), were lower in *Cd2-Cre Lis1<sup>flox/flox</sup>* mice as compared  
141 those that in control mice expressing LIS1, suggesting that LIS1 might be important for the  
142 rearrangement of the TCR $\beta$  chain and/or for the expansion of cells that successfully rearranged  
143 the TCR $\beta$  chain (Figure 1C). The expression level of CD5 was slightly increased in *Cd2-Cre*  
144 *Lis1<sup>flox/flox</sup>* DN3 thymocytes compared to that in *Lis1<sup>flox/flox</sup>* DN3 cells, whereas IL-7R cell  
145 surface levels was not affected by LIS1 expression, suggesting that LIS1 was not required for  
146 functional pre-TCR assembly but rather for the expansion of DN3 thymocytes after the  $\beta$ -  
147 selection checkpoint (Figure 1D and 1E). Notch signaling leads to increase cell sizes of  
148 thymocyte after  $\beta$ -selection and to the up-regulation of the transferrin receptor CD71 (39, 40).  
149 The loss of LIS1 did not affect these two parameters, suggesting that LIS1 is dispensable for  
150 Notch-mediated signaling (Figure 1E). To evaluate whether LIS1 is important for the  
151 proliferation of DN3 thymocytes following the  $\beta$ -selection checkpoint, we quantified DN cells  
152 that have duplicated DNA copies prior and after the  $\beta$ -selection checkpoint. Thymocytes with  
153 duplicated DNA copies could not be detected prior the  $\beta$ -selection checkpoint in wild-type and

154 LIS1-deficient mice (Figure 1F). Approximately 10% of thymocytes were in the G2/M phase  
155 of cell cycle after  $\beta$ -selection in wild-type mice whereas this proportion rose to 20% in LIS1-  
156 deficient mice, suggesting a possible failure of LIS1-deficient thymocytes to successfully  
157 complete division cycles (Figure 1F).

158

159 To directly address this hypothesis, we analyzed the proliferation of DN3 thymocytes upon  
160 stimulation with OP9-D11 cells, a bone-marrow-derived stromal cell line that ectopically  
161 expresses the Notch ligand, Delta-like 1 (D11), and which induces efficient T-cell  
162 lymphopoiesis from the DN stages to the DP stage (41). We observed that the percentages of  
163 cells that proliferate in response to OP9-D11 stimulation were strongly decreased in the absence  
164 of LIS1 (Figure 2A). This was associated with a failure of DN3 cells to effectively differentiate  
165 into CD25-CD44- DN4 cells (Figure 2B). The TCR $\beta$  chain and the receptor CD5 were up-  
166 regulated normally after stimulation, indicating that the defect in proliferation was not the  
167 consequence of defects in stimulatory signals required for proliferation and differentiation  
168 (Figure 2C). The loss of LIS1 also did not affect the expression of CD71 (Figure 2D) and Bcl-  
169 2 (Figure 2E), which depends on Notch and IL-7R signaling respectively (42, 43), suggesting  
170 that LIS1 does not operate downstream of these receptors. By contrast, cell cycle analysis  
171 showed that the loss of LIS1 led to a strong accumulation of cells at the G2/M stage, indicative  
172 of ineffective division processes after the DNA duplication phase (Figure 2F). Together, those  
173 results suggest that LIS1 controls cellular events that are required for the efficient division of  
174 thymocytes after the  $\beta$ -selection checkpoint.

175

176 **LIS1 is required for TCR-mediated proliferation in CD4+ T cells**

177



178 Previous studies suggested that LIS1-deficient CD4<sup>+</sup> and CD8<sup>+</sup> T cells fail to proliferate in  
179 response to cytokine-driven homeostatic signals but successfully divide in response to TCR  
180 cross-linking *in vitro* or following infection with a *Listeria monocytogenes* strain expressing  
181 ovalbumin (34). Since the loss of LIS1 had such a strong impact on thymocyte proliferation  
182 following pre-TCR stimulation, we decided to compare the role of LIS1 in the proliferation of  
183 CD4<sup>+</sup> and CD8<sup>+</sup> T cells in response to TCR engagement.

184

185 To examine the role of LIS1 in peripheral T cells, we conditionally disrupt *Pafah1b1* using a  
186 Cre recombinase transgene driven by the *Cd4* promoter, which is up-regulated at the DP stage  
187 after the proliferation step of DN3-DN4 thymocytes. We observed that the loss of LIS1 at this  
188 stage of development did not affect the percentages and numbers of DN, DP and SP thymocytes  
189 (Figure 3 – Figure Supplement 1A). Normal numbers of mature TCR<sup>hi</sup>CD24<sup>low</sup> SP thymocytes  
190 were also generated in the absence of LIS1 (Figure 3 – Figure Supplement 1B). The maturation  
191 of DP thymocytes into TCR<sup>hi</sup>CD4 SP thymocytes occurred also normally in *Cd4-Cre Lis1<sup>fllox/fllox</sup>*  
192 mice expressing a fixed MHC class II–restricted  $\alpha\beta$ -TCR transgene (AND), suggesting that  
193 LIS1 is not essential for positive selection (Figure 3 – Figure Supplement 1C). As previously  
194 reported in a similar conditional knockout model (34), the deletion of LIS1 led to a dramatic  
195 decrease of peripheral CD4<sup>+</sup> and CD8<sup>+</sup> T cells numbers (Figure 3 – Figure Supplement 1D).  
196 This defect was previously imputed to a reduced ability of CD4<sup>+</sup> and CD8<sup>+</sup> T cells to  
197 proliferate in response to cytokine-driven homeostatic signals (34). In contrast, the mono-allelic  
198 deletion of LIS1 in *Cd4-Cre Lis1<sup>fllox/+</sup>* did not affect the numbers of CD4<sup>+</sup> and CD8<sup>+</sup> T cells  
199 (Figure 3 – Figure Supplement 1E), suggesting that reduced LIS1 dosage does not affect T-cell  
200 homeostasis.

201

202 We next evaluated the effect of LIS1 deficiency on the proliferation of CD4<sup>+</sup> and CD8<sup>+</sup> T cells  
203 following TCR stimulation. We observed that the percentages of proliferating CD4<sup>+</sup> T cells  
204 were strongly decreased in the absence of LIS1 following TCR stimulation (Figure 3A). The  
205 analysis of cell percentages in each division cycle showed that LIS1-deficient CD4<sup>+</sup> T cells  
206 successfully performed the first cycle of division but failed to divide further and accumulated  
207 at this stage (Figure 3A). Similar results were obtained following stimulation with Phorbol 12-  
208 myristate 13-acetate (PMA) and ionomycin, indicating that LIS1-dependent effects on CD4<sup>+</sup>  
209 T-cell proliferation were not dependent on proximal TCR signaling events (Figure 3A). In  
210 contrast, mono-allelic deletion of the LIS1 encoding gene did not affect the rate of proliferating  
211 CD4<sup>+</sup> T cells following TCR stimulation (Figure 3 – Figure Supplement 2A). Activation  
212 markers such as CD25 and CD69 were also up-regulated normally in the absence of LIS1,  
213 indicating that more distal TCR signaling events were not affected by LIS1 deficiency (Figure  
214 3B). Cell cycle analysis show that CD4<sup>+</sup> T cells with duplicated DNA copies accumulated in  
215 LIS1-deficient T cells as compared to that in control cells following stimulation (Figure 3C).  
216 Contrasting with the strong effect observed on CD4<sup>+</sup> T cell proliferation, the loss of LIS1 had  
217 a rather modest impact on the total fraction of CD8<sup>+</sup> T cells that proliferate in response to TCR  
218 cross-linking and on the fraction of cells that had successfully divided after the first division  
219 cycle (Figure 3D). The loss of LIS1 also did not result in the accumulation of CD8<sup>+</sup> T cells  
220 with duplicated DNA copies (Figure 3C). LIS1 was not detected in cell extracts from both  
221 CD4<sup>+</sup> and CD8<sup>+</sup> T cells from *Cd4-Cre Lis1<sup>flox/flox</sup>* mice, indicating that the mild impact of LIS1  
222 on CD8<sup>+</sup> T cell proliferation was not the consequence of the remaining expression of LIS1 in  
223 this subset (Figure 3 – Figure Supplement 2B). Also, the stimulation of CD8<sup>+</sup> T cells with PMA  
224 and ionomycin led to an important decrease of the total fraction of proliferating T cells,  
225 suggesting that cell divisions in CD8<sup>+</sup> T cells are controlled by different mechanisms, which  
226 vary according to their LIS1-dependency based on the context of stimulation.

227

228 To determine whether LIS1 controls the proliferation of CD4<sup>+</sup> T cells in response to antigen  
229 stimulation *in vivo*, we crossed *Cd4-Cre Lis1<sup>fllox/fllox</sup>* mice with transgenic mice expressing the  
230 allotypic marker CD45.1 and the class-II restricted OT2 TCR specific for the chicken  
231 ovalbumin 323-339 peptide. CD4<sup>+</sup> T cells from OT2<sup>+</sup> *Cd4-Cre Lis1<sup>fllox/fllox</sup>* and *Lis1<sup>fllox/fllox</sup>* mice  
232 were stained with CellTrace violet (CTV) and injected into C57Bl/6 mice expressing the  
233 allotypic marker CD45.2<sup>+</sup>. Mice were next immunized with ovalbumin and CD45.1<sup>+</sup>CD4<sup>+</sup> T  
234 cells were analyzed in the spleen at day two, three and seven after immunization. The numbers  
235 of LIS1-deficient CD45.1<sup>+</sup> CD4<sup>+</sup> T cells in the spleen were similar to those of control cells at  
236 day two after immunization, indicating that the loss of LIS1 did not affect the ability of CD4<sup>+</sup>  
237 T cells to migrate into the spleen (Figure 3E). At this stage, the percentages of divided cells  
238 were very low and were not significantly different according to LIS1 expression. At day three  
239 after immunization, we observed a large fraction of divided *Lis1<sup>fllox/fllox</sup>* CD45.1<sup>+</sup>CD4<sup>+</sup> T cells,  
240 with the majority of cells having completed more than two rounds of division (Figure 3E and  
241 3F). By contrast, the fraction of divided cells was strongly decreased in the absence of LIS1  
242 with almost a complete failure of those cells to engage more than one division cycle (Figure 3E  
243 and 3F). Numbers of LIS1-deficient CD4<sup>+</sup>CD45.1<sup>+</sup> T cells were strongly decreased compared  
244 to control CD4<sup>+</sup>CD45.1<sup>+</sup> T cells that express LIS1 (Figure 3E). Of note, the expression level  
245 of CD44 on undivided CD4<sup>+</sup>CD45.1<sup>+</sup> T cells was similar whether or not LIS1 was expressed,  
246 suggesting that LIS1 was not required for CD4<sup>+</sup> T-cell activation *in vivo* (Figure 3F). The loss  
247 of LIS1 also resulted in a marked decrease in the percentages and numbers of CD4<sup>+</sup>CD45.1<sup>+</sup>  
248 T cells at day seven after immunization (Figure 3 – Figure Supplement 2C). Together, these  
249 results suggest that CD4<sup>+</sup> and CD8<sup>+</sup> T cells engage distinct cell division mechanisms upon  
250 antigen priming that diverge in their requirement for LIS1.

251

252 **LIS1-dependent control of chromosome alignment during metaphase is required for**  
253 **effective mitosis**

254

255 We next aimed to more precisely characterize the role of LIS1 during the division of CD4<sup>+</sup> T  
256 cells. Our data suggest a block either at the G2 or the M phase of cell cycle in LIS1-deficient  
257 thymocytes and CD4<sup>+</sup> T cells (Figure 1E, Figure 2E and Figure 3C). We used image stream  
258 flow cytometry to discriminate cells with duplicated DNA copies that contain chromosomes (in  
259 M phase) from cells that have uncondensed DNA (in G2 phase). *Cd4-Cre Lis1<sup>lox/lox</sup>* and  
260 *Lis1<sup>lox/lox</sup>* CD4<sup>+</sup> T cells were stimulated for 48 hours with anti-CD3 and anti-CD28 antibodies  
261 and stained with DAPI. Analysis were next performed on cells with duplicated DNA copies.  
262 The Bright Detail Intensity (BDI) feature on the DAPI channel, which evaluates areas of peak  
263 fluorescence intensity after subtraction of background fluorescence, was selected for its ability  
264 to automatically discriminate cells in M and G2 phases, as illustrated in Figure 4A. The  
265 percentages of mitotic CD4<sup>+</sup> T cells were increased in the absence of LIS1, suggesting that  
266 LIS1-deficient CD4<sup>+</sup> T cells fail to complete mitosis. To determine more precisely the stage of  
267 mitosis at which this defect occurs, we analyzed whether LIS1 was required for cells to  
268 successfully reach metaphase. *Cd4-Cre Lis1<sup>lox/lox</sup>* and *Lis1<sup>lox/lox</sup>* CD4<sup>+</sup> T cells were stimulated  
269 for 48 hours with anti-CD3 and anti-CD28 antibodies and synchronized with nocodazole for 18  
270 hours prior treatment with MG132 to induce metaphase arrest. The percentages of cells in  
271 metaphase were evaluated by image stream flow cytometry using the “Elongatedness”  
272 parameter, which calculates the length to width ratios (L/W) on pre-defined DAPI masks.  
273 CD4<sup>+</sup> T cells with L/W ratios superior to 1.5 show aligned chromosomes patterns  
274 representative of metaphase (Figure 4B). This analysis showed that the percentages of cells,  
275 which successfully reached metaphase were strongly reduced in the absence of LIS1 (Figure  
276 4B). To more precisely characterized mitotic events that could be affected by LIS1-deficiency,

277 we next analyzed the course of mitosis in *Cd4-Cre Lis1<sup>fllox/fllox</sup>* and *Lis1<sup>fllox/fllox</sup>* CD4<sup>+</sup> T cells by  
278 time-lapse microscopy. We observed that both *Cd4-Cre Lis1<sup>fllox/fllox</sup>* and *Lis1<sup>fllox/fllox</sup>* CD4<sup>+</sup> T cells  
279 successfully condensed their DNA to form chromosomes (Figure 4C, video 1, 2 and 3).  
280 However, chromosomes remained disorganized in *Cd4-Cre Lis1<sup>fllox/fllox</sup>* CD4<sup>+</sup> T cells and failed  
281 to segregate rapidly after condensation as compared to those in control cells (Figure 4C). At the  
282 final step of mitosis, LIS1-deficient CD4<sup>+</sup> T cells either failed to divide (Figure 4C, 4D and  
283 video 2) or divided with an apparent unequal repartition of chromosomes in daughter cells  
284 (Figure 4C, 4D and video 3), which was associated with the formation of multiple nuclei or  
285 multilobed nuclei (Figure 4C and video 2). Confirming the observations based on time-lapse  
286 microscopy, quantitative analysis on G2 cells selected by image stream showed that the  
287 percentages of cells with multiple nuclei were strongly increased in the absence of LIS1 (Figure  
288 4E).

289  
290 The abnormal repartition of chromosomes in daughter cells, so called aneuploidy, is generally  
291 associated with the up-regulation of the tumor suppressor p53, which contributes to eliminate  
292 cells through apoptotic processes prior the emergence of possible oncogenic transformation  
293 (44). To determine whether impaired mitosis associated to LIS1-deficiency leads to apoptosis,  
294 we analyzed the percentages of apoptotic cells in undivided and divided peripheral CD4<sup>+</sup> T  
295 cells following stimulation with anti-CD3 and anti-CD28 antibodies for 48 hours. We observed  
296 that the loss of LIS1 was associated with increased frequency of apoptotic cells among divided  
297 cells, but had no significant effect on apoptosis in activated CD25<sup>+</sup> undivided cells (Figure  
298 5A). Analysis of p53 expression prior the initial cycle of division at 24 hours, showed  
299 comparable expression level of p53 between wild-type and LIS1-deficient cells, whereas p53  
300 expression was dramatically increased in LIS1-deficient CD4<sup>+</sup> T cells as compared to that in  
301 control cells after the initial division cycles at 48 hours (Figure 5B). In comparison, the

302 abundance of p53 after 48 hours of stimulation was comparable in wild-type and LIS1-deficient  
303 CD8<sup>+</sup> T cells, supporting that the loss of LIS1 has a modest impact on cell division in the CD8<sup>+</sup>  
304 lineage (Figure 5B). Analysis was next performed on DN3 thymocytes stimulated with OP9-  
305 D11 cells and led to a similar increase of apoptosis exclusively in divided thymocytes from  
306 LIS1-deficient mice (Figure 5C). The expression level of p53 was also strongly increased in  
307 total LIS1-deficient DN3 thymocytes as compared to that in wild-type DN3 cells (Figure 5D).  
308 Altogether, those results indicate that the loss of LIS1 results in a defective chromosomes  
309 congression and separation during metaphase, which leads to aneuploidy, to the up-regulation  
310 of p53 and to the development of apoptotic program.

311

312 **LIS1 controls mitotic spindle and centrosome integrity in CD4<sup>+</sup> T cells by promoting the**  
313 **formation of dynein-dynactin complexes**

314

315 Each spindle pole is normally established by one centrosome containing a pair of centrioles  
316 embedded in the pericentriolar material (PCM) containing  $\gamma$ -tubulin ring complexes ( $\gamma$ -TuRCs)  
317 from which microtubules nucleate. Centrosomes replicate once every cell cycle during the G1-  
318 S phase (45). Anomaly in centrosomes replication and PCM fragmentation may lead to the  
319 formation of extra-centrosomes which can be associated to the formation of multipolar spindles  
320 and to the unequal repartition of chromosomes (46, 47). Previous studies in embryonic  
321 fibroblast show that the loss of LIS1 is associated with the formation of multipolar spindle due  
322 to the formation of extra-centrosomes (33). However, this defect is not systematically observed  
323 in the absence of LIS1. For instance, the loss of LIS1 in hematopoietic stem cells has a moderate  
324 effect on the integrity of the mitotic spindle but rather affects the spindle positioning during  
325 telophase, leading to increased rate of asymmetric divisions (18).

326

327 To evaluate whether the loss of LIS1 could be associated with an aberrant number of  
328 centrosomes or to a loss of centrosome integrity prior the division of CD4<sup>+</sup> T cells, we  
329 stimulated CTV stained CD4<sup>+</sup> T cells from *Cd4-Cre Lis1<sup>flox/flox</sup>* and *Lis1<sup>flox/flox</sup>* mice with anti-  
330 CD3 and anti-CD28 antibodies for 48 hours and FACS sorted undivided CTV<sup>hi</sup> cells based on  
331 the forward-size-scattered parameter to discriminate unactivated (forward-scatter [FSC]<sup>lo</sup>) from  
332 activated (FSC<sup>hi</sup>) cells. Cells were analyzed by confocal microscopy after  $\gamma$ -tubulin and DAPI  
333 staining. In the presence of LIS1, we observed that the vast majority of FSC<sup>lo</sup> CD4<sup>+</sup> T cells  
334 contained a single centrosome, whereas the majority FSC<sup>hi</sup> cells had two centrosomes as  
335 expected from cells in mitosis (Figure 6A). In the absence of LIS1, more than 50% of mitotic  
336 FSC<sup>hi</sup> CD4<sup>+</sup> T cells had more than two centrosomes (Fig. 6A). The loss of LIS1 did not affect  
337 centrosome copy numbers in unactivated CD4<sup>+</sup> T cells (Figure 6A), indicating that LIS1 is  
338 engaged following TCR stimulation once the cell cycle has started, possibly at the stage of  
339 centrosome duplication. Some extra-centrosomes showed reduced accumulation of  $\gamma$ -tubulin as  
340 compared to normal centrosomes in wild-type cells, suggesting that the loss of LIS1 leads to  
341 PCM fragmentation or to the loss of centrosome integrity rather than centrosome  
342 supernumerary duplication (Figure 6B). Analysis of  $\gamma$ - and  $\alpha$ -tubulin stainings in LIS1-  
343 deficient CD4<sup>+</sup> T cells show that these extra-centrosomes were “active” in that they could  
344 effectively nucleate microtubule fibers (Figure 6B). Multiple centrosomes were also observed  
345 in cells sorted post- $\beta$ -selection DN3 thymocytes (Figure 6C). Together, these results indicate  
346 that LIS1 is required for the formation of stable bipolar mitotic spindles upon division of  
347 thymocytes and CD4<sup>+</sup> T cells.

348

349 The biochemical basis by which LIS1 affects dynein function has been the focus of intense  
350 investigations yielding to contradictory findings and divergent models (15). Evidence from  
351 early studies suggest that LIS1 might be acting as a “clutch” that would prevent dynein's

352 ATPase domain from transmitting a detachment signal to its track-binding domain (20). More  
353 recent *in vitro* investigations with recombinant proteins identify critical function for LIS1 in  
354 the assembly of active dynein-dynactin complexes (21, 22). To analyze whether the cellular  
355 defect observed in LIS1-deficient CD4<sup>+</sup> T cells could be associated with defect in dynein-  
356 dynactin complex assembly, we compared the amount of p150Glued, a subunit of the dynactin  
357 complex, that co-immunoprecipitated with the intermediate chain of dynein (DIC) in CD4<sup>+</sup> T  
358 cells isolated from *Cd4-Cre Lis1<sup>flox/flox</sup>* and *Lis1<sup>flox/flox</sup>* mice (48). The amount of p150Glued that  
359 co-immunoprecipitated with DIC was decreased in LIS1-deficient cells as compared to wild-  
360 type controls (Figure 6D). Similar amount of the dynein heavy chain (DHC) was co-  
361 immunoprecipitated with the DIC in LIS1-deficient and wild-type cells (Figure. 6D), indicating  
362 that the defect in DIC-p150Glued interaction was not due do ineffective assembly of the dynein  
363 complex itself. These results suggest that LIS1 controls the integrity of mitotic spindle pole  
364 assembly in peripheral CD4<sup>+</sup> T cells by stabilizing the association between dynein and dynactin  
365 complexes.



366 **Discussion**

367

368 In this study, we identified a selective LIS1-requirement for mitosis in thymocytes and  
369 peripheral CD4<sup>+</sup> T cells following  $\beta$ -selection and antigen priming, respectively. LIS1-  
370 dependent proliferation defects resulted in a block of early T-cell development and in a nearly  
371 complete lack of CD4<sup>+</sup> T-cell expansion following activation. LIS1 deficiency in thymocytes  
372 and CD4<sup>+</sup> T cells led to a disruption of dynein-dynactin complexes, which was associated with  
373 a loss of centrosome integrity and with the formation of multipolar spindles. These mitotic  
374 abnormalities were in turn associated to abnormal chromosomes reorganization during  
375 metaphase and telophase and to aneuploidy and p53 up-regulation upon cell division.  
376 Importantly, whereas LIS1 deficiency led to a strong block of CD8<sup>+</sup> T-cell proliferation upon  
377 PMA and ionomycin stimulation, it had very little effects, if any, on the proliferation of CD8<sup>+</sup>  
378 T cells following TCR engagement, suggesting that the mitotic machinery that orchestrates  
379 mitosis in CD8<sup>+</sup> T cells upon TCR stimulation is different from that engaged in thymocytes  
380 and peripheral CD4<sup>+</sup> T cells upon pre-TCR and TCR engagement.

381

382 LIS1 was shown to be dispensable for the proliferation of antigen-specific CD8<sup>+</sup> T cell  
383 following infection with *Listeria monocytogenes* (34), supporting the data that we report here  
384 in CD8<sup>+</sup> T cells following TCR stimulation. Comparable cell type-specific effects of LIS1 on  
385 proliferation have been described at early stages of neurogenesis and hematopoiesis (16, 18).  
386 The loss of LIS1 in neuroepithelial stem cells leads to mitotic arrest and apoptosis upon  
387 symmetrical division events associated to progenitor cell maintenance, whereas it has only a  
388 moderate effect on asymmetrical division associated with neurogenesis, suggesting that  
389 symmetric division might be more LIS1-sensitive than asymmetric division (16). Accordingly,  
390 LIS1-deficiency leads to a dramatic decrease of proliferation when CD8<sup>+</sup> T cells are stimulated

391 with soluble ligands such as cytokines and PMA/ionomycin, which favor symmetric division  
392 (34). This suggests that the different sensitivity of CD4+ and CD8+ T cells to LIS1 deficiency  
393 upon cell division is not simply the consequence of a preferential use of LIS1 in CD4+ T cells  
394 but rather the consequence of different mitotic organizations in CD4+ and CD8+ T cells in the  
395 context of polarized cell stimulations, which might exhibit different requirement for LIS1. This  
396 raises the question of whether CD4+ T cells would be more prone to symmetric divisions than  
397 CD8+ T cells. Theoretically, the experimental settings that we used in this study might not be  
398 optimal for eliciting asymmetric cell division, since we stimulated T cells with anti-CD3 and  
399 anti-CD28 in the absence of ICAM-1, which is required for asymmetric cell divisions to occur  
400 in the context of APC stimulation (8). However, the rate of asymmetric cell divisions might be  
401 less influenced by ICAM-1 stimulation in conditions where plate-bound stimulations with  
402 antibodies are used (49). Asymmetric cell divisions have been detected in CD4+ T cells after  
403 the first antigen encounter (8), but it is unknown whether these divisions occur systematically  
404 or whether they occur with variable frequencies that could be context-dependent. It is also  
405 unclear whether CD4+ and CD8+ T cells have similar rates of asymmetric division since the  
406 literature is lacking of quantitative studies in which cellular events associated to mitosis would  
407 be investigated side-by-side in those two subsets. The repartition of the transcription factor T-  
408 bet in daughter cells was compared in one study by flow cytometry in CD4+ and CD8+ T cells  
409 after a first round of cell division (12). Authors showed that T-bet segregates unequally in  
410 daughter cells in both CD4+ and CD8+ T cells. However, the disparity of T-bet between  
411 daughter cells was higher in CD8+ T cells as compared to that in CD4+ T cells (5- versus 3-  
412 fold), suggesting that cell-fate determinants are either more equally (or less unequally)  
413 distributed in daughter cells from the CD4+ lineage or that the rate of symmetric divisions is  
414 higher in CD4+ T cells than in the CD8+ T cells. More extensive analysis would be required to

415 precisely quantify the rate of symmetric and asymmetric cell divisions in CD4+ and CD8+ T  
416 cells in the context of APC stimulation.

417

418 Mechanistically, we show that LIS1 is important in CD4+ T cells to stabilize the interaction of  
419 the microtubule-associated motor protein dynein with the dynactin complex, which facilitates  
420 the binding of dynein to cargos and promotes thereby their transport along microtubule fibers.  
421 This is in agreement with recent *in vitro* studies showing that LIS1 is required for the efficient  
422 assembly of active dynein-dynactin complexes (21, 22). Given the pleiotropic role of the  
423 dynein-dynactin complexes during mitosis, several scenarios could possibly explain the defect  
424 of proliferation observed in thymocytes and peripheral CD4+ T cells. Two non-exclusive  
425 scenarios seem the most likely to us. A first scenario is that the loss of LIS1 leads to an  
426 inefficient attachment of the chromosome kinetochores to dynein, leading to metaphase delay  
427 and possibly to the asynchronous chromatid separation, a phenomena call “cohesion fatigue”,  
428 which leads to centriole separation and the formation of multipolar spindles (50). This  
429 possibility is supported by studies showing that LIS1 is localized to the kinetochores in  
430 fibroblasts and is required for the normal alignment of chromosomes during metaphases (33,  
431 51) and for targeting the dynein complex to kinetochore (33). A second possibility is that the  
432 absence of LIS1 leads to the fragmentation of the PCM, which is associated with the formation  
433 of multipolar spindles and the erroneous merotelic kinetochore-microtubule attachments (a  
434 single kinetochore attached to microtubules oriented to more than one spindle pole), which can  
435 cause chromosomal instability in cells that ultimately undergo bipolar division (52). This is  
436 supported by the facts that several PCM components are transported towards centrosomes along  
437 microtubules by the dynein–dynactin motor complex (53, 54) and that the depletion of multiple  
438 pericentriolar proteins results in PCM fragmentation, which subsequently generates multipolar  
439 spindles (54-56).

440

441 We previously identified LIS1 as a binding partner of the signaling protein THEMIS in  
442 thymocytes and confirmed this interaction through yeast two-hybrid approaches (31, 32).  
443 THEMIS enhances positive selection in thymocytes (57-59) and is important for the  
444 maintenance of peripheral CD8<sup>+</sup> T cells by stimulating cytokine-driven signals leading to  
445 homeostatic proliferation (60). Although LIS1 deficiency does not modulate the efficiency of  
446 thymocyte positive selection, the loss of LIS1 is associated with a strong defect of peripheral T  
447 cell proliferation in response to IL-2 and IL-15 stimulation (34). THEMIS and LIS1  
448 deficiencies both lead to severely compromised CD8<sup>+</sup> T cell proliferation following transfer in  
449 lymphopenic hosts (34, 60). Although this defect was attributed to stimulatory function of  
450 THEMIS on IL-2 and IL-15-mediated signaling, we cannot rule out the possibility that  
451 THEMIS would play a more direct role in cell cycle by controlling LIS1-mediated events.  
452 THEMIS operates by repressing the tyrosine phosphatase activity of SHP-1 and SHP-2, which  
453 are key regulatory proteins of TCR signaling (61). Gain-of-function mutations of SHP-2 in  
454 mouse embryonic fibroblast and leukemia cells lead to centrosome amplification and aberrant  
455 mitosis with misaligned chromosomes (62). Thus, the hyper activation of SHP-2 resulting from  
456 THEMIS deficiency may lead to cellular defects similar to those observed in LIS1-deficient T  
457 cells. An interesting perspective to this work would be to investigate further whether the loss  
458 of THEMIS in CD8<sup>+</sup> T cells would lead to similar mitotic defects to those observed in LIS1-  
459 deficient thymocytes and CD4<sup>+</sup> T cells upon TCR stimulation.

460

461 The fact that LIS1 deficiency increases the frequency of aneuploidy and leads to the up-  
462 regulation of p53 expression suggests that defects affecting LIS1 expression or function could  
463 favor oncogenic transformation in lymphoid cells. LIS1 is necessary for the extensive growth  
464 of tumor cells in some cancer models. The genetic disruption of LIS1 in hematopoietic stem

465 cells blocks the propagation of myeloid leukemia (18). However, several evidences suggest  
466 also that the alteration of LIS1 expression could contribute to the carcinogenesis of several  
467 cancers such as hepatocellular carcinoma (63, 64), neuroblastoma (65), glioma (66) and  
468 cholangiocarcinoma (67). Thus, although a minimal expression level of LIS1 might be  
469 mandatory for extensive tumor growth, partial deficiencies in LIS1 might favor oncogenic  
470 transformation. Although mono-allelic deficiency of LIS1 did not detectably affect CD4+ T-  
471 cell proliferation *in vitro*, the partial loss of LIS1 function may enhance the risk of aneuploidy-  
472 driven cancer in a tumor-suppressor failing context. This could be relevant in humans since  
473 genetic variants on *pafah1b1* have been associated with a higher risk to develop acute myeloid  
474 leukemia (68).

475

476

477 **Materials and methods**

478

479 **Key Resources Table**

| <b>Key Resources Table</b>                |                                    |                            |                                                                                                                                                                                                                                            |                                                                                              |
|-------------------------------------------|------------------------------------|----------------------------|--------------------------------------------------------------------------------------------------------------------------------------------------------------------------------------------------------------------------------------------|----------------------------------------------------------------------------------------------|
| <b>Reagent type (species) or resource</b> | <b>Designation</b>                 | <b>Source or reference</b> | <b>Identifiers</b>                                                                                                                                                                                                                         | <b>Additional information</b>                                                                |
| Genetic reagent (Mus. musculus)           | 129S-Pafah1b <sup>1tm2Awb</sup> /J | Jackson laboratories       | Strain #:008002<br>RRID:IMSR_JAX:008002                                                                                                                                                                                                    | This stain was provided by Dr. Deanna S. Smith (University of South Carolina, Columbia, USA) |
| Genetic reagent (Mus. musculus)           | B6.Cg-Tg(CD2-icre)4Kio/J           | Jackson laboratories       | Strain #:008520<br>RRID:IMSR_JAX:008520                                                                                                                                                                                                    |                                                                                              |
| Genetic reagent (Mus. musculus)           | Tg(Cd4-cre)1Cwi/BfluJ              | Jackson laboratories       | Strain #:017336<br>RRID:IMSR_JAX:017336                                                                                                                                                                                                    |                                                                                              |
| Cell line<br>Mus musculus                 | OP9-dl1                            |                            | Schmitt TM, de Pooter RF, Gronski MA, Cho SK, Ohashi PS, Zuniga-Pflucker JC. Induction of T cell development and establishment of T cell competence from embryonic stem cells differentiated in vitro. Nature immunology. 2004;5(4):410-7. |                                                                                              |
| antibody                                  | anti-CD3ε<br>Hamster monoclonal    | Biologend                  | clone 2C-11                                                                                                                                                                                                                                | Purified unconjugated                                                                        |
| antibody                                  | anti-CD28<br>Hamster monoclonal    | Biologend                  | clone 37.51                                                                                                                                                                                                                                | Purified unconjugated                                                                        |
| antibody                                  | anti-CD8α<br>Rat monoclonal        | Thermo Fisher Scientific   | clone 53-6.7                                                                                                                                                                                                                               | Conjugated to A-700<br>1/300                                                                 |
| antibody                                  | anti-CD4<br>Rat monoclonal         | BD Bioscience              | clone RM4-5                                                                                                                                                                                                                                | Conjugated to Pacific Blue<br>1/1000                                                         |
| antibody                                  | anti-CD24<br>Rat monoclonal        | BioLegend                  | clone M1/69                                                                                                                                                                                                                                | Conjugated to PE<br>1/500                                                                    |
| antibody                                  | anti-TCRβ<br>Hamster monoclonal    | BD Bioscience              | clone H57-597                                                                                                                                                                                                                              | Conjugated to FITC<br>1/400                                                                  |

|          |                                               |                             |                |                                       |
|----------|-----------------------------------------------|-----------------------------|----------------|---------------------------------------|
| antibody | anti-TCR $\beta$<br>Hamster monoclonal        | Thermo Fisher<br>Scientific | clone H57-597  | Conjugated to<br>PECy7<br>1/1500      |
| antibody | anti-V $\alpha$ 11<br>Rat monoclonal          | BD Bioscience               | clone RR8-1    | Conjugated to<br>FITC<br>1/400        |
| antibody | anti-CD5<br>Rat monoclonal                    | BD Bioscience               | clone 53-7.3   | Conjugated to<br>APC<br>1/1000        |
| antibody | anti-CD5<br>Rat monoclonal                    | Thermo Fisher<br>Scientific | clone 53-7.3   | Conjugated to<br>FITC<br>1/1000       |
| antibody | anti-CD69<br>Hamster monoclonal               | BD Bioscience               | clone H1.2F3   | Conjugated to<br>FITC<br>1/200        |
| antibody | anti-B220<br>Rat monoclonal                   | BD Bioscience               | clone RA3-6B2  | Conjugated to<br>PE<br>1/400          |
| antibody | anti-Gr1<br>Rat monoclonal                    | BioLegend                   | clone RB6-8C5  | Conjugated to<br>PE<br>1/300          |
| antibody | anti-CD11b<br>Rat monoclonal                  | BioLegend                   | clone M1/70    | Conjugated to<br>PE<br>1/200          |
| antibody | anti-CD11c<br>Hamster monoclonal              | BioLegend                   | clone N418     | Conjugated to<br>PE<br>1/200          |
| antibody | anti-Ter119<br>Rat monoclonal                 | BioLegend                   | clone TER119   | Conjugated to<br>PE<br>1/200          |
| antibody | anti-CD3 $\epsilon$<br>Hamster monoclonal     | BioLegend                   | clone 145-2C11 | Conjugated to<br>PE<br>1/200          |
| antibody | anti-NK1.1<br>Mouse monoclonal                | BD Bioscience               | clone PK136    | Conjugated to<br>PE<br>1/200          |
| antibody | anti-TCR $\gamma\delta$<br>Hamster monoclonal | BD Bioscience               | clone GL3      | Conjugated to<br>1/200                |
| antibody | anti-CD44<br>Rat monoclonal                   | Thermo Fisher<br>Scientific | clone IM7      | Conjugated to<br>FITC<br>1/200        |
| antibody | anti-CD25<br>Rat monoclonal                   | BD Bioscience               | clone PC61.5   | Conjugated to<br>PercP Cy5.5<br>1/300 |
| antibody | anti-CD71<br>Rat monoclonal                   | BioLegend                   | clone R17217   | Conjugated to<br>PeCy7<br>1/400       |
| antibody | Anti-CD27<br>Hamster monoclonal               | BD Bioscience               | clone LG.3A10  | Conjugated to<br>APC<br>1/200         |
| antibody | anti-IL-7R<br>Rat monoclonal                  | BD Bioscience               | clone A7R34    | Conjugated to<br>A700 1/500           |

|          |                                             |                               |                   |                                      |
|----------|---------------------------------------------|-------------------------------|-------------------|--------------------------------------|
| antibody | anti-IL-7R<br>Rat monoclonal                | BD Bioscience                 | clone A7R34       | Conjugated to<br>APC 1/400           |
| antibody | anti-BCL-2<br>Hamster monoclonal            | BD Bioscience                 | clone 3F11        | Conjugated to<br>FITC                |
| antibody | anti-CD19<br>Rat monoclonal                 | BioLegend                     | clone 1D3/CD19    | Conjugated to<br>PercPCY5.5<br>1/500 |
| antibody | anti-c-kit<br>Rat monoclonal                | BioLegend                     | clone 2B8         | Conjugated to<br>PE<br>1/200         |
| antibody | anti-c-kit<br>Rat monoclonal                | BD Bioscience                 | clone 2B8         | Conjugated to<br>APC<br>1/200        |
| antibody | anti-IgM<br>Rat monoclonal                  | BD Bioscience                 | clone RMM-1       | Conjugated to<br>PECy7<br>1/300      |
| antibody | anti-CD45.1<br>Mouse monoclonal             | BD Bioscience                 | clone A20         | Conjugated to<br>PE<br>1/500         |
| antibody | anti- $\gamma$ -tubulin<br>Mouse monoclonal | Biolegend                     | clone 14C11       | Purified<br>unconjugated             |
| antibody | anti- $\alpha$ -tubulin<br>Mouse monoclonal | Thermo Fisher<br>Scientific   | clone DM1A        | Purified<br>unconjugated             |
| antibody | Goat anti-Mouse IgG2b                       | Thermo Fisher<br>Scientific   | cat#A-21147       | Alexa Fluor™ 555                     |
| antibody | anti-Dynein IC<br>Mouse monoclonal          | Santa-Cruz<br>biotechnologies | clone 74-1        | Purified<br>unconjugated             |
| antibody | anti-LIS1<br>Rabbit polyclonal              | Santa-Cruz<br>biotechnologies | sc-15319          | Purified<br>unconjugated             |
| antibody | anti-Dynein HC<br>Rabbit polyclonal         | Santa-Cruz<br>biotechnologies | sc-9115           | Purified<br>unconjugated             |
| antibody | Anti-p150glued<br>Mouse monoclonal          | BD Biosciences                | clone 1/p150Glued | Purified<br>unconjugated             |
| antibody | anti-p53<br>Mouse monoclonal                | Cell signaling                | clone 1C12        | Purified<br>unconjugated             |
| antibody | anti-Rac1<br>Mouse monoclonal               | Millipore                     | clone 23A8        | Purified<br>unconjugated             |
| other    | AnnexinV                                    | BD bioscience                 | RRID: AB_2868885  | APC                                  |
| other    | AnnexinV binding buffer                     | BD bioscience                 | Cat#556454        |                                      |
| other    | eBioscience™ Fixable<br>Viability Dye       | Thermo Fisher<br>Scientific   | Cat#65-0865-14    | eFluor™ 780<br>APC-H7                |
| other    | Permeabilization<br>buffer                  | Thermo Fisher<br>Scientific   | Cat#00-8333-56    |                                      |
| other    | Chambered glass<br>coverslip                | IBIDI                         | Cat#80821         |                                      |



|                         |                                           |                          |            |          |
|-------------------------|-------------------------------------------|--------------------------|------------|----------|
| other                   | Dynabeads™ Untouched™ Mouse CD4 Cells Kit | Thermo Fisher Scientific | Cat#11415D |          |
| <u>other</u>            | DAPI                                      | Sigma-Aldrich            | cat#D9542  | 1mg/mL   |
| <u>other</u>            | Hoechst 33342                             | Sigma-Aldrich            | cat#14533  | 50ng/ml  |
| <u>Other</u>            | Cell trace Violet                         | Thermo Fisher Scientific | cat#C34557 | 2 μM     |
| <u>Other</u>            | DABCO                                     | Sigma Aldrich            | cat#D27802 |          |
| chemical compound, drug | Nocodazole                                | Sigma Aldrich            | cat#M1404  | 100ng/ml |
| chemical compound, drug | MG132                                     | Sigma Aldrich            | cat#M7449  | 10 μM    |
| chemical compound, drug | phorbol 12-myristate 13-acetate (PMA)     | Sigma Aldrich            | cat#P8139  | 100ng/ml |
| chemical compound, drug | Ionomycine                                | Sigma Aldrich            | cat#I0634  | 100ng/ml |
| chemical compound, drug | RIBI                                      | Sigma Adjuvant System    | cat#S6322  |          |
| Cytokine                | Mouse IL-7                                | Peptotech                | cat#217-17 | 10 ng/ml |
| software                | IDEAS                                     | Millipore                |            |          |

480

## 481 Mice

482 *Lis1<sup>fllox/flox</sup>* mice were described previously (69). These mice were bred with hCD2-cre  
483 transgenic mice (<https://www.jax.org/strain/008520>) in which the human *cd2* promoter directs  
484 the expression of the CRE recombinase at early stages of T and B cell development. *Lis1<sup>fllox/flox</sup>*  
485 mice were also bred with CD4-Cre transgenic mice (<https://www.jax.org/strain/017336>) in  
486 which the *cd4* promoter directs the expression of the CRE recombinase during T cell  
487 development in CD4+CD8+ thymocytes. AND and OT-2 TCR-transgenic mice were from  
488 Taconic Farms. All the experiments were conducted with sex and age-matched mice between  
489 6 and 12 weeks old housed under specific pathogen-free conditions at the INSERM animal  
490 facility (US-006; accreditation number A-31 55508 delivered by the French Ministry of

491 Agriculture to perform experiments on live mice). All experimental protocols were approved  
492 by a Ministry-approved ethics committee (CEEA-122) and follow the French and European  
493 regulations on care and protection of the Laboratory Animals (EC Directive 2010/63).

494

## 495 **Antibodies**

496 The following antibodies were used.

497 *For stimulation and cell culture:* anti-CD3 $\epsilon$  (145-2C11) and anti-CD28 (37.51) antibodies were  
498 from Biolegend. *For cell sorting and flow cytometry analysis:* anti-CD8 $\alpha$  (clone 53-6.7), anti-  
499 CD4 (clone RM4-5), anti-CD24 (clone M1/69), anti-TCR $\beta$  (clone H57-597), anti-V $\alpha$ 11 (clone  
500 RR8-1), anti-CD5 (clone 53-7.3), anti-CD69 (clone H1.2F3), anti-B220 (clone RA3-6B2), anti-  
501 Gr1 (clone RB6-8C5), anti-CD11b (clone M1/70), anti-CD27 (clone LG.3A10), anti-CD11c  
502 (clone N418), anti-Ter119 (clone TER119), anti-CD3 (clone 145-2C11), anti-NK1.1 (clone  
503 PK136), anti-TCR $\gamma\delta$  (clone GL3), anti-CD44 (clone IM7), anti-CD25 (clone PC61.5), anti-  
504 CD71 (clone R17217), anti-IL-7R (clone A7R34), anti-BCL-2 (clone 3F11), anti-CD19 (clone  
505 1D3/CD19), anti-c-kit (clone 2B8), anti-IgM (clone RMM-1) and anti-CD45.1 (clone A20)  
506 were from BD Bioscience and Biolegend. *For imaging studies:* anti- $\gamma$ -tubulin (clone 14C11)  
507 was from Biolegend and anti- $\alpha$ -tubulin (DM1A) was from (Thermo Fisher Scientific). *For*  
508 *immunoprecipitation and Western blot analysis:* anti-DIC (clone 74-1), IgG2b isotype control  
509 (sc-3879), anti-LIS1 (sc-15319), anti-DHC (sc-9115) were from Santa-Cruz biotechnologies.  
510 Anti-p150glued (clone 1/p150Glued) were from BD Biosciences, anti-p53 (clone 1C12) were  
511 from Cell Signaling and anti-Rac1 (clone 23A8) were from Millipore.

512

## 513 **Flow cytometry and cell sorting**

514 For flow cytometry analysis, single-cell suspensions from thymus, spleen, lymph nodes and  
515 bone marrows were incubated with diluted eBioscience™ Fixable Viability Dye eFluor™ 780  
516 (ThermoFisher) in phosphate-buffered saline (PBS) prior staining with fluorochrome-  
517 conjugated antibodies. Intracellular staining was performed after cell fixation with 4% para-  
518 formaldehyde (PFA) by incubating the cells with conjugated antibodies in permeabilization  
519 buffer (Thermo Fisher Scientific). For the phenotyping of DN subsets, thymocytes were stained  
520 with an anti-lineage cocktail (anti-Gr1, anti-CD11b, anti-CD11c, anti-Ter119, anti-CD3, anti-  
521 B220, anti-NK1.1 and anti-TCR $\gamma\delta$ ) and with anti-CD8 $\alpha$  and anti-CD4 antibodies. Data  
522 acquisition was performed on a BD LSRII flow cytometer and analysis with the FlowJo  
523 software.

524 For DN3 cell purification, thymocytes were first immunomagnetically depleted of CD3, CD4  
525 or CD8 $\alpha$  positive cells. Lin<sup>-</sup>CD44<sup>-</sup>CD25<sup>+</sup>CD5<sup>-</sup> or Lin<sup>-</sup>CD44<sup>-</sup>CD25<sup>+</sup>CD71<sup>-</sup> DN3 cells were  
526 sorted on a BD FACS Aria cell sorter. For peripheral T cells isolation, total CD4<sup>+</sup> T cells and  
527 CD8<sup>+</sup> T cells were purified from ACK-treated pooled lymph nodes and spleen by magnetic  
528 immunodepletion of CD8<sup>+</sup>, B220<sup>+</sup>, MHCII<sup>+</sup>, NK1.1<sup>+</sup>, Fc $\gamma$ <sup>+</sup> and CD11b<sup>+</sup> cells and CD4<sup>+</sup>, B220<sup>+</sup>,  
529 MHCII<sup>+</sup>, NK1.1<sup>+</sup>, Fc $\gamma$ <sup>+</sup> and CD11b<sup>+</sup> cells, respectively.

530

## 531 **Cell culture**

532 For OP9-DL1 cells co-cultures, OP9-DL1 cells (41) were seeded at 8000 cells per well in 48-  
533 well plates and incubated for 24 hours in OP9 culture media (alpha-MEM, 20% FCS, Penicillin  
534 and Streptomycin), followed by addition of 100,000 sorted CD5<sup>-</sup> or CD71<sup>-</sup> DN3 thymocytes  
535 per well together with 10 ng/ml recombinant mouse IL-7 (PeproTech).

536 For proliferation analysis, CD5<sup>-</sup> DN3 thymocytes, CD4<sup>+</sup> and CD8<sup>+</sup> lymph nodes T cells were  
537 labeled with 2  $\mu$ M CTV (Thermo Fisher Scientific) for 15 min at 37 °C. Thymocytes were  
538 cultured with OP9-DL1 cells and peripheral T cells were incubated with the indicated doses of  
539 anti-CD3 antibodies and with 2 $\mu$ g/ml anti-CD28 antibodies for 48 and 72 hours. For apoptosis  
540 analysis, thymocytes and CD4<sup>+</sup> T cells were stained with CTV and stimulated for 48 hours as  
541 described for proliferation analysis. After stimulation, cells were stained with fluorochrome-  
542 conjugated annexin-5 (BD Biosciences) in annexin-5 binding buffer (BD Biosciences). For cell  
543 cycle analysis, thymocytes and CD4<sup>+</sup> T cells were stimulated for 48 hours as indicated above.  
544 Cells were fixed with 4% para-formaldehyde (PFA) and incubated with permeabilization buffer  
545 prior staining with DAPI in PBS.

546

#### 547 **Image stream flow cytometry**

548 For the analysis of the G2/M population, CD4<sup>+</sup> T cells were stimulated with 10 $\mu$ g/ml of anti-  
549 CD3 antibodies with 2 $\mu$ g/ml of anti-CD28 antibodies for 24 hours. Cells were synchronized by  
550 addition of nocodazole (Sigma Aldrich) at 100ng/ml for 18h. Cells were then washed in RPMI  
551 supplemented with 10% FCS and incubated with 10  $\mu$ M of MG132 (Sigma Aldrich) for 3h.  
552 Cells were incubated with Fixable Viability Dye prior staining with fluochrome-conjugated  
553 anti-CD4 antibodies and DAPI and acquired on an ImageStreamX apparatus from Millipore.

554 Data were analyzed using the IDEAS analysis software from Millipore. We used the “Bright  
555 Detail Intensity” (BDI) parameter to discriminate mitotic cells from cells in the G2 phase. This  
556 parameter calculates the intensity of the bright pixels after subtraction of the background noise  
557 from the images. Cells in mitosis having condensed DNA will present a homogeneously bright  
558 staining leading to higher BDI value than cells in the G2 phase with uncondensed DNA. To

559 evaluate cells in metaphase, we used the parameter “Elongatedness” which calculates the length  
560 to width ratio on a predefined DAPI mask. Cells with an “Elongatedness” value exceeding 1.5  
561 were characterized as cells in metaphase.

562

### 563 **Immunization with ovalbumin**

564 CD45.1+ CD4+ T cells were purified from lymph nodes and splenocytes from *Lis1<sup>flox/flox</sup>* and  
565 *CD4-Cre Lis1<sup>flox/flox</sup>* mice expressing the OT2 TCR.  $2 \times 10^6$  cells in PBS were injected i.v. into  
566 C57BL/6J mice (CD45.2<sup>+</sup>) one hour before immunization with 40  $\mu$ g of ovalbumin emulsified  
567 with RIBI (Sigma Adjuvant System). CD4<sup>+</sup> T cell populations from the spleen were analyzed  
568 2 and 3 days after immunization.

569

### 570 **Confocal analysis**

571 CD4+ T cells were labeled with CTV and incubated with 10  $\mu$ g/ml of anti-CD3 antibodies and  
572 2  $\mu$ g/ml of anti-CD28 antibodies for 48 hours. The CTV<sup>hi</sup>FSC<sup>lo</sup> (non-proliferating, non-  
573 activated) and CTV<sup>hi</sup>FSC<sup>hi</sup> (non-proliferating, activated) populations were sorted by flow  
574 cytometry. Lin<sup>-</sup>CD44<sup>-</sup>CD25<sup>+</sup>CD5<sup>hi</sup> thymocytes were sorted by flow cytometry. Cells were  
575 deposited on 0.01% poly-L-lysine adsorbed slides (Sigma aldrich), fixed with 4% PFA and  
576 permeabilized in PBS containing 0.1% Saponin (Sigma Aldrich).  $\alpha$ - and  $\gamma$ -tubulin staining was  
577 made in PBS containing 0.1% Saponin, 3% Bovin serum albumin (BSA) and 10mM HEPES at  
578 4°C for 18h and revealed with fluorochrome-conjugated anti-mouse and IgG1 and IgG2b  
579 antibodies (Thermo Fisher Scientific) for 1 hour at room temperature. DNA was stained with  
580 DAPI for 15 min at room temperature in PBS. The slides were then mounted with DABCO

581 solution (Sigma Aldrich) and the images were acquired with an LSM710 confocal microscope  
582 equipped with a 63× 1.4 NA objective (Zeiss).

583 For video microscopy, CD4+ T cells were cultured with 10 µg/ml of anti-CD3 and 2 µg/ml of  
584 anti-CD28 antibodies on a chambered glass coverslip (IBIDI) for 24 hours. To stain DNA,  
585 Hoechst 33342 (Sigma-Aldrich) was added to the culture at a final concentration of 50ng/ml.  
586 Cells were observed for 18 hours in a chamber at 37°C and 5% CO<sub>2</sub> with a Spinning disk  
587 confocal microscope. The z-stack images were edited into film and analyzed using ImageJ.

588

### 589 **Immunoprecipitation and Western blot analysis**

590 For immunoprecipitation, CD4+ T cells were resuspended in 2 ml of ice-cold lysis buffer (10  
591 mM tris-HCl pH 7.4, 150 mM NaCl, 1% Triton, 2 mM Na<sub>3</sub>VO<sub>4</sub>, 5 mM NaF, 1 mM EDTA, and  
592 protease inhibitor cocktail tablet (Roche)) and incubated for 20 min on ice. Lysates were cleared  
593 by centrifugation at 18,000g for 15 min at 4°C, and the dynein intermediate chain (DIC) was  
594 subjected to immunoprecipitation from cleared lysates for 2 hours at 4°C with 15 µl of protein  
595 G-Sepharose resin coated with 12 µg of polyclonal rabbit anti-DIC antibodies. The resin was  
596 washed three times and incubated for 10 min at 95°C with Laemmli buffer. For p53 analysis,  
597 CD4+ T cells were stimulated with 10 µg/ml of anti-CD3 and 2 µg/ml of anti-CD28 antibodies  
598 for 24 and 48 hours and were suspended in ice-cold lysis buffer after each time point. Proteins  
599 were resolved by SDS-PAGE and transferred to PVDF membranes according to standard  
600 protocols. Membranes were blocked with 5% milk in tris-buffered saline containing Tween at  
601 0.05% for 1 hour at room temperature before being incubated with primary antibodies at 4°C  
602 overnight. After washing, membranes were incubated with secondary antibodies for 1 hour at  
603 room temperature. Subsequently, membranes were incubated with enhanced

604 chemiluminescence solution (Sigma) for 5 min in the dark, and luminescence was captured  
605 with a Bio-Rad XRS+ imager.

606

### 607 **Statistical analysis**

608 GraphPad Prism was used to perform statistical analysis. All values in the paper are  
609 presented as mean  $\pm$  SD. Except when indicated, statistical significance was calculated  
610 by unpaired two-tailed Mann-Whitney *t* test. \* $p < 0,05$  \*\* $p < 0,001$  \*\*\* $p < 0,0001$  \*\*\*\* $P <$   
611  $0.0001$ .

612

613

614

615 **Data availability**

616

617 All data generated or analyzed during this study are included in the manuscript and supporting  
618 files. Source data files have been provided for Figures 1, 2, 3 ,4, 5, and 6 as well as for Figure  
619 1 – Figure supplement 1, Figure 3 – Figure supplement 1 and Figure 3 – Figure supplement 2.



620 **Aknowledgments**

621

622 The authors thank Loïc Dupré for helpful comments and suggestions and Dr. Deanna Smith for  
623 providing  $Lis1^{flox/flox}$  mice. We acknowledge the technical assistance provided by the personnel  
624 of INSERM US006 Anexpl0/creffre animal facility. The authors thank Fatima-Ezzahra  
625 L'Faqihi-Olive and Anne-Laure Iscache from the cytometry facility of INFINITy as well as  
626 Sophie Allart and Astrid Canivet from the cell imaging facility of INFINITy. Funding: This  
627 work was supported by INSERM; the Foundation ARSEP; the Association pour la Recherche  
628 sur le Cancer (ARC); the Agence Nationale de la Recherche (ANR-20-CE15-0002); the French  
629 Ministry of Higher Education and Research (PhD fellowship for J.A. and S.M.). Competing  
630 interests: The authors declare that they have no competing interests. Data and materials  
631 availability: All data needed to evaluate the conclusions of the paper are present in the paper or  
632 the Supplementary Materials.

633 **Figure and video legends**

634

635 **Figure 1. LIS1 is required for T cell development following the  $\beta$ -selection checkpoint.**

636 Phenotypic analyses of thymocytes from *Lis1<sup>flox/flox</sup>* and *CD2-Cre Lis1<sup>flox/flox</sup>* mice. (A) Dot plots  
637 show CD4 versus CD8 surface staining on thymocytes from *Lis1<sup>flox/flox</sup>* and *CD2-Cre Lis1<sup>flox/flox</sup>*  
638 mice. Histogram bars represent the numbers of thymocytes in each indicated subset from mice  
639 of the indicated genotype. Data are mean  $\pm$  S.D. and represent a pool of four independent  
640 experiments each including n=3-4 mice per group. (B) Dot plots show CD44 versus CD25  
641 surface staining on CD4-CD8- [DN] thymocytes from *Lis1<sup>flox/flox</sup>* and *CD2-Cre Lis1<sup>flox/flox</sup>* mice.  
642 Histogram bars represent the numbers of thymocytes in each indicated subset from mice of the  
643 indicated genotype. Data are mean  $\pm$  S.D. and represent a pool of five independent experiments  
644 each including n=4-5 mice per group. (C) Dot plots show CD27 versus TCR $\beta$  intracellular  
645 staining on DN3 thymocytes from *Lis1<sup>flox/flox</sup>* and *CD2-Cre Lis1<sup>flox/flox</sup>* mice. Histogram bars  
646 represent the percentages of TCR $\beta^{\text{hi}}$ CD27 $^{\text{hi}}$  thymocytes in DN3 thymocytes. Data are mean  $\pm$   
647 S.D. and represent a pool of two independent experiments each including n=2-3 mice per group.  
648 (D) Dot plots show CD5 versus TCR $\beta$  intracellular staining on DN3 thymocytes from *Lis1<sup>flox/flox</sup>*  
649 and *CD2-Cre Lis1<sup>flox/flox</sup>* mice. Histogram bars represent the percentages of TCR $\beta^{\text{hi}}$ CD5 $^{\text{hi}}$   
650 thymocytes in DN3 thymocytes and the MFI of TCR $\beta$  and CD5 in DN3 TCR $\beta^{\text{hi}}$ CD5 $^{\text{hi}}$   
651 thymocytes from mice of the indicated genotype. Data are mean  $\pm$  S.D. and represent a pool of  
652 two independent experiments each including n=3 mice per group. (E) Histogram graphs show  
653 IL-7R, CD71 surface staining and FSC on DN3 thymocytes expressing the TCR $\beta$  chain.  
654 Histogram bars represent the MFI of IL-7R, CD71 and FSC in the indicated DN3 thymocytes  
655 subsets. Data are mean  $\pm$  S.D. and represent a pool of two independent experiments each  
656 including n=3 mice per group. (F) Histogram graphs show DNA intracellular staining on DN3  
657 thymocytes from the indicated subsets. The percentages represent cells in the G2/M phase of

658 cell cycle. Histogram bars represent the percentages of DN3 TCR $\beta^{\text{hi}}$ CD5 $^{\text{hi}}$  thymocytes in the  
659 G2/M phase of cell cycle. Data are mean  $\pm$  S.D. and represent a pool of three independent  
660 experiments each including n=1 mouse per group. Unpaired two-tailed Mann–Whitney t tests  
661 were performed for all analysis. \*\*P < 0.01; \*\*\*P < 0.001; \*\*\*\*P < 0.0001.

662

663 **Figure 2. LIS1 is required for the proliferation of immature thymocytes after the  $\beta$ -**

664 **selection checkpoint.** (A) CD5 $^{\text{lo}}$  DN3 thymocytes from *Lis1 $^{\text{flox/flox}}$*  and *CD2-Cre Lis1 $^{\text{flox/flox}}$*  were

665 stained with CTV and stimulated with OP9-D11 cells for 48 or 72 hours. The histogram graph

666 shows CTV dilution. Bar graphs represent the proliferation of cells determined by flow

667 cytometry at 24, 48 and 72 hours after stimulation. Data are mean  $\pm$  S.D. and represent three to

668 seven independent experiments each including n=1-2 pooled mice per group. (B) CD5 $^{\text{lo}}$  DN3

669 thymocytes from *Lis1 $^{\text{flox/flox}}$*  and *CD2-Cre Lis1 $^{\text{flox/flox}}$*  were stimulated with OP9-D11 cells for the

670 indicated periods of time. Dot plots show CD44 versus CD25 surface staining on thymocytes

671 from *Lis1 $^{\text{flox/flox}}$*  and *CD2-Cre Lis1 $^{\text{flox/flox}}$*  mice. Data are representative of three independent

672 experiments each including n=1-2 pooled mouse per group. (C) CD71 $^{\text{lo}}$  DN3 thymocytes from

673 *Lis1 $^{\text{flox/flox}}$*  and *CD2-Cre Lis1 $^{\text{flox/flox}}$*  were stimulated with OP9-D11 cells for 24 hours. Dot plots

674 show CD5 versus TCR $\beta$  intracellular staining on thymocytes. Histogram bars represent the

675 percentages of TCR $\beta^{\text{hi}}$ CD5 $^{\text{hi}}$  thymocytes in DN3 thymocytes and the MFI CD5 in DN3

676 TCR $\beta^{\text{hi}}$ CD5 $^{\text{hi}}$  thymocytes from mice of the indicated genotype. Data are mean  $\pm$  S.D. and

677 represent four independent experiments each including n=1-2 pooled mice per group. (D)

678 CD71 $^{\text{lo}}$  DN3 thymocytes from *Lis1 $^{\text{flox/flox}}$*  and *CD2-Cre Lis1 $^{\text{flox/flox}}$*  were stimulated with OP9-

679 D11 cells for 48 hours. Dot plots show CD5 versus CD71 staining on CTV $^{\text{hi}}$  thymocytes.

680 Histogram bars represent the percentages of CD71 $^{\text{hi}}$ CD5 $^{\text{hi}}$  thymocytes in CTV $^{\text{lo}}$  DN3

681 thymocytes. Data are mean  $\pm$  S.D. and represent four independent experiments each including

682 n=1-2 pooled mice per group. (E) CD71 $^{\text{lo}}$  DN3 thymocytes from *Lis1 $^{\text{flox/flox}}$*  and *CD2-Cre*

683 *Lis1<sup>flox/flox</sup>* were stimulated with OP9-D11 cells for 24 hours. The histogram graph shows BCL-  
684 2 intracytoplasmic staining in TCR $\beta^{\text{lo}}$ CD5 $^{\text{lo}}$  and TCR $\beta^{\text{hi}}$ CD5 $^{\text{hi}}$  thymocyte subsets. Histogram  
685 bars represent the MFI of BCL-2 in the indicated DN3 thymocyte subsets. Data are mean  $\pm$   
686 S.D. and represent three independent experiments each including n=1-2 pooled mice per group.  
687 (F) CD71 $^{\text{lo}}$  DN3 thymocytes from *Lis1<sup>flox/flox</sup>* and *CD2-Cre Lis1<sup>flox/flox</sup>* were stimulated with OP9-  
688 D11 cells for 48 hours. Histogram graphs show DNA intracellular staining on thymocytes from  
689 the indicated DN3 subsets. The indicated percentages represent cells in the G2/M phase of cell  
690 cycle. Histogram bars represent the percentages of DN3 TCR $\beta^{\text{hi}}$ CD5 $^{\text{hi}}$  thymocytes in the G2/M  
691 phase of cell cycle. Data are mean  $\pm$  S.D. and represent six independent experiments each  
692 including n=1-2 pooled mice per group. (A) Unpaired two-tailed Welch t tests were performed.  
693 (C-E) Unpaired two-tailed Mann–Whitney t tests were performed. \*P < 0.05, \*\*P < 0.01.

694

695 **Figure 3. LIS1 is required for the proliferation of CD4<sup>+</sup> T cells in response to antigen**  
696 **stimulation.** (A) CD4<sup>+</sup> T cells from *Lis1<sup>flox/flox</sup>* and *CD4-Cre Lis1<sup>flox/flox</sup>* were stained with CTV  
697 and stimulated with anti-CD3 and anti-CD28 antibodies or with PMA and ionomycin (P/I) for  
698 72 hours. The histogram graphs show CTV dilution. Bar graphs represent the percentages of  
699 cells that divided at least one-time (Tot.) or that divided 1, 2 or 3 times (D1, D2, D3) as  
700 determined by flow cytometry at 72 hours after stimulation. Data are mean  $\pm$  S.D. and represent  
701 five independent experiments each including n=3 mice per group. (B) CD4<sup>+</sup> T cells from  
702 *Lis1<sup>flox/flox</sup>* and *CD4-Cre Lis1<sup>flox/flox</sup>* were stimulated with anti-CD3 and anti-CD28 antibodies for  
703 24 hours. Bar graphs represent the percentages of cells expressing CD25 and CD69 as  
704 determined by flow cytometry. Data are mean  $\pm$  S.D. and represent two independent  
705 experiments each including n=1-2 mice per group. (C) CD4<sup>+</sup> and CD8<sup>+</sup> T cells from *Lis1<sup>flox/flox</sup>*  
706 and *CD4-Cre Lis1<sup>flox/flox</sup>* were stimulated with anti-CD3 and anti-CD28 antibodies for 48 hours.  
707 Histogram graphs show DNA intracellular staining on CD4<sup>+</sup> T cells. The indicated percentages

708 represent cells in the G2/M phase of cell cycle. Histogram bars represent the percentages of  
709 CD4<sup>+</sup> and CD8<sup>+</sup> T cells in the G2/M phase of cell cycle. Data are mean ± S.D. and represent  
710 two independent experiments each including n=3 mice per group. (D) CD8<sup>+</sup> T cells from  
711 *Lis1<sup>flox/flox</sup>* and *CD4-Cre Lis1<sup>flox/flox</sup>* were stained with CTV and stimulated with anti-CD3 and  
712 anti-CD28 antibodies or with PMA and ionomycin (P/I) for 72 hours. The histogram graph  
713 shows CTV dilution. Bar graphs represent the percentages of cells that divided at least one-time  
714 (Tot.) or that divided 1, 2 or 3 times (D1, D2, D3) as determined by flow cytometry at 72 hours  
715 after stimulation. (E and F) C57BL/6j mice (CD45.2<sup>+</sup>) were injected i.v. with CTV stained  
716 CD45.1<sup>+</sup>CD4<sup>+</sup> T cells from *OT2-Lis1<sup>flox/flox</sup>* and *OT2-CD4-Cre Lis1<sup>flox/flox</sup>* mice. Mice were then  
717 immunized with ovalbumine emulsified in RIBI. Proliferation of CD45.1<sup>+</sup>CD4<sup>+</sup> T cells was  
718 analyzed at day two and three after immunization. (E) Bar graphs represent the proliferation  
719 and numbers of CD45.1<sup>+</sup>CD4<sup>+</sup> T cells as determined by flow cytometry at day two and three  
720 after immunization. Data are mean ± S.D. and are representative of one experiment out of two  
721 independent experiments each including n=5 mice per group. (F) The histogram graph shows  
722 CTV dilution in CD45.1<sup>+</sup>CD4<sup>+</sup> T cells at day 3 after immunization. Histograms overlay shows  
723 CD44 surface staining on undivided CD45.1<sup>+</sup>CD4<sup>+</sup> T cells at day 3 after immunization. Data  
724 are representative of one experiment out of two independent experiments each including n=5  
725 mice per group. Unpaired two-tailed Mann–Whitney t tests were performed for all analysis. \*P  
726 < 0.05; \*\*P < 0.01; \*\*\*P < 0.001; \*\*\*\*P < 0.0001.

727

728 **Figure 4. Dysfunctional chromosome alignment in LIS1-deficient CD4<sup>+</sup> T cells leads to**  
729 **abortive mitosis and aneuploidy.** (A) CD4<sup>+</sup> T cells from *Lis1<sup>flox/flox</sup>* and *CD4-Cre Lis1<sup>flox/flox</sup>*  
730 mice were stimulated with anti-CD3 and anti-CD28 antibodies for 48 hours. Histogram graphs  
731 represent the *Bright Detail Intensity* (BDI) feature on CD4<sup>+</sup> T cells in the G2/M phase as  
732 determined by image stream flow cytometry. Numbers represent the percentages of cells in

733 mitosis according to the BDI feature. Images represent DAPI staining in BDI<sup>low</sup> and BDI<sup>hi</sup>  
734 *LisI<sup>flox/flox</sup>* CD4<sup>+</sup> T cells. Bar graphs represent the percentages of cells in mitosis (M) out of cells  
735 in the G2/M phase (n=30000 cells). Data are mean ± S.D. and represent three independent  
736 experiments each including n=1 mouse per group. (B) CD4<sup>+</sup> T cells from *LisI<sup>flox/flox</sup>* and *CD4-*  
737 *Cre LisI<sup>flox/flox</sup>* were stimulated with anti-CD3 and anti-CD28 antibodies for 24 hours,  
738 synchronized with nocodazole for 18 hours and incubated with MG132 for 3h to induce  
739 metaphase arrest. Histogram graphs represent the *Elongatedness* feature on CD4<sup>+</sup> T cells in the  
740 M phase as determined by image stream flow cytometry. Numbers represent the percentages of  
741 cells in metaphase according to *Elongatedness* feature (n=30000 cells). Images represent DAPI  
742 staining in *Elongatedness<sup>low</sup>* and *Elongatedness<sup>hi</sup>* *LisI<sup>flox/flox</sup>* CD4<sup>+</sup> T cells. Bar graphs represent  
743 the percentages of cells in metaphase out of cells in the M phase. Data are mean ± S.D. and  
744 represent three independent experiments each including n=1 mouse per group. (C) Time-lapse  
745 microscopy analysis of cell division in CD4<sup>+</sup> T cells from *LisI<sup>flox/flox</sup>* and *CD4-Cre LisI<sup>flox/flox</sup>*  
746 stimulated with anti-CD3 and anti-CD28 antibodies. Images represent DNA staining on CD4<sup>+</sup>  
747 T cells at the indicated times (hours:minutes). White arrows represent cells with uncondensed  
748 DNA. Red arrows represent the same cells after chromosomes formation. The top red arrows  
749 in the *CD4-Cre LisI<sup>flox/flox</sup>* panel are representative of abortive mitosis. The bottom red arrows  
750 in the *CD4-Cre LisI<sup>flox/flox</sup>* panel are representative of mitosis leading to aneuploidy. Bar graphs  
751 represent the time of mitosis per cell. Data are mean ± S.D. and represent three independent  
752 experiments each including n=1 mouse per group. (D) Mitosis outcomes in *LisI<sup>flox/flox</sup>* and *CD4-*  
753 *Cre LisI<sup>flox/flox</sup>* CD4<sup>+</sup> T cells stimulated with anti-CD3 and anti-CD28 antibodies. Numbers  
754 represent percentages in the different section out of a total of n=62-64 mitosis analyzed. Data  
755 represent three independent experiments each including n=1 mouse per group. (E) CD4<sup>+</sup> T cells  
756 from *LisI<sup>flox/flox</sup>* and *CD4-Cre LisI<sup>flox/flox</sup>* were stimulated with anti-CD3 and anti-CD28  
757 antibodies for 48 hours. Cells in G2 phase were analyzed by image stream flow cytometry.

758 Cells stained with DAPI and Bright-field (BF) images are represented. Bar graphs represent the  
759 percentages of cells with multilobed nuclei (n=400 cells). Data are mean  $\pm$  S.D. and represent  
760 three independent experiments each including n=1 mouse per group. (A and B) Unpaired two-  
761 tailed Welch t tests were performed. (C) Unpaired two-tailed Mann–Whitney t test was  
762 performed. \*P < 0.05; \*\*P < 0.01; \*\*\*P < 0.001; \*\*\*\*P < 0.0001.

763

764 **Figure 5. Proliferation leads to p53 up-regulation and apoptosis in LIS1-deficient**  
765 **thymocytes and CD4<sup>+</sup> T cells.** (A) CD4<sup>+</sup> T cells from *Lis1<sup>fllox/fllox</sup>* and *CD4-Cre Lis1<sup>fllox/fllox</sup>* were  
766 stained with CTV and stimulated with anti-CD3 and anti-CD28 antibodies for 48 hours. The  
767 histogram graphs show annexin-5 staining on CTV<sup>hi</sup> (top panel) and CTV<sup>low</sup> (bottom panel)  
768 CD25<sup>+</sup>CD4<sup>+</sup> T cells. Bar graphs represent the percentages of annexin5<sup>+</sup> cells in the indicated  
769 subsets. Data are mean  $\pm$  S.D. and represent two independent experiments each including n=1-  
770 2 mice per group. (B) Total CD4<sup>+</sup> and CD8<sup>+</sup> T cells from *Lis1<sup>fllox/fllox</sup>* and *CD4-Cre Lis1<sup>fllox/fllox</sup>*  
771 mice were stimulated with anti-CD3 and anti-CD28 antibodies for the indicated times. Total  
772 cytoplasmic extracts of the cells were then analyzed by Western blotting with antibodies against  
773 p53, Rac1 and GAPDH, the loading controls. Data are representative of two independent  
774 experiments. (C) CD5<sup>lo</sup> DN3 thymocytes from *Lis1<sup>fllox/fllox</sup>* and *CD2-Cre Lis1<sup>fllox/fllox</sup>* were stained  
775 with CTV and stimulated with OP9-D11 cells for 48 hours. The histogram graphs show annexin-  
776 5 staining on CTV<sup>hi</sup> (top panel) and CTV<sup>low</sup> (bottom panel) CD5<sup>hi</sup>CD4<sup>+</sup> T cells. Bar graphs  
777 represent the percentages of annexin5<sup>+</sup> cells in the indicated subsets. Data are mean  $\pm$  S.D. and  
778 represent two independent experiments each including n=2 mice per group. (D) Total  
779 cytoplasmic extracts of the DN thymocytes were analyzed by Western blotting with antibodies  
780 against p53 and Rac1, the loading control. Data are representative of two independent  
781 experiments. Unpaired two-tailed Welch t tests were performed in A and C. \*P < 0.05; \*\*\*P <  
782 0.001.

783  
784  
785  
786  
787  
788  
789  
790  
791  
792  
793  
794  
795  
796  
797  
798  
799  
800  
801  
802  
803  
804  
805  
806  
807

**Figure 6. Impaired formation of dynein/dynactin complexes is associated with the loss of centrosome integrity and the formation of multipolar spindles in LIS-1 deficient thymocytes and CD4<sup>+</sup> T cells.** (A) CD4<sup>+</sup> T cells from *Lis1<sup>fllox/fllox</sup>* and *CD4-Cre Lis1<sup>fllox/fllox</sup>* were stained with CTV and stimulated with anti-CD3 and anti-CD28 antibodies for 48 hours. Images represent Maximum Intensity Projection of  $\gamma$ -tubulin and DAPI staining on undivided FSC<sup>lo</sup> (top panel) and FSC<sup>hi</sup> (bottom panel) CD4<sup>+</sup> T cells. Bar graphs represent the percentages of cells with the indicated number of centrosome in total cells (top graph) or in mitotic cells (bottom graph). Data represent one experiment out of two independent experiments with n=30-50 cells analyzed per group. (B) CD4<sup>+</sup> T cells from *Lis1<sup>fllox/fllox</sup>* and *CD4-Cre Lis1<sup>fllox/fllox</sup>* mice were stained with CTV and stimulated with anti-CD3 and anti-CD28 antibodies for 48 hours. Images represent Maximum Intensity Projection of  $\gamma$ -tubulin and  $\alpha$ -tubulin staining on undivided FSC<sup>hi</sup> CD4<sup>+</sup> T cells. Bar graphs represent the size of the pericentriolar region (PCM) based on  $\gamma$ -tubulin staining in mitotic cells with the indicated number of centrosomes. Data represent three experiments with n=16-54 centrosomes analyzed per group. (C) Images represent Maximum Intensity Projection of  $\gamma$ -tubulin and DAPI staining CD5<sup>hi</sup> DN3 thymocytes. Bar graphs represent the percentages of cells with the indicated number of centrosomes in mitotic cells. Data represent one experiment out of two independent experiments with n=30-50 cells analyzed per group. (D) CD4<sup>+</sup> T cell extracts from *Lis1<sup>fllox/fllox</sup>* and *CD4-Cre Lis1<sup>fllox/fllox</sup>* mice were subjected to immunoprecipitation (IP) with antibodies specific of the intermediate chain of dynein (DIC) or with an IgG2b isotype control and then analyzed by Western blotting with antibodies specific of the indicated proteins (Dynein heavy chain [DHC]). Data represent one experiment out of two independent experiments. Unpaired two-tailed Mann–Whitney t test was performed. \*\*\*\*P < 0.0001.



808 **Video 1. Time-lapse microscopy of mitosis in wild-type CD4<sup>+</sup> T cells.** Time-lapse  
809 microscopy analysis of mitosis in CD4<sup>+</sup> T cells from wild-type mice stimulated with anti-CD3  
810 and anti-CD28 antibodies. Videos represent DNA staining (right panel) and bright field (left  
811 panel) on CD4<sup>+</sup> T cells.

812

813 **Video 2. Time-lapse microscopy of abortive mitosis in Lis1-deficient CD4<sup>+</sup> T cells.** Time-  
814 lapse microscopy analysis of mitosis in CD4<sup>+</sup> T cells from *CD4-Cre Lis1<sup>fllox/fllox</sup>* mice stimulated  
815 with anti-CD3 and anti-CD28 antibodies. Videos represent DNA staining (right panel) and  
816 bright field (left panel) on CD4<sup>+</sup> T cells.

817

818 **Video 3. Time-lapse microscopy of mitosis with aneuploidy in Lis1-deficient CD4<sup>+</sup> T cells.**  
819 Time-lapse microscopy analysis of mitosis in CD4<sup>+</sup> T cells from *CD4-Cre Lis1<sup>fllox/fllox</sup>* mice  
820 stimulated with anti-CD3 and anti-CD28 antibodies. Videos represent DNA staining (right  
821 panel) and bright field (left panel) on CD4<sup>+</sup> T cells.

822

823 **Figure 1 – Figure Supplement 1. LIS1 is required for B cell development.** (A) Dot plots  
824 show TCR versus B220 and CD4 versus CD8 surface staining on splenocytes from *Lis1<sup>fllox/fllox</sup>*  
825 and *CD2-Cre Lis1<sup>fllox/fllox</sup>* mice. Histogram bars represent the numbers of thymocytes in each  
826 indicated subset from mice of the indicated genotype. Data are mean ± S.D. and represent four  
827 independent experiments each including n=3-4 mice per group. (B) Dot plots show CD4 versus  
828 CD8 surface staining on total thymocytes and CD44 versus CD25 surface staining on CD4-  
829 CD8- [DN] thymocytes from *Lis1<sup>fllox/+</sup>* and *CD2-Cre Lis1<sup>fllox/+</sup>* mice. Histogram bars represent  
830 the percentages of thymocytes in each indicated subset from mice of the indicated genotype.  
831 Data are mean ± S.D. and represent a pool of two independent experiments each including n=1-  
832 2 mice per group. (C) Upper dot plots show B220 versus CD19 on bone marrow cells from

833 *LisI<sup>fllox/fllox</sup>* and *CD2-Cre LisI<sup>fllox/fllox</sup>* mice. Lower dot plots show IgM versus c-Kit staining on  
834 B220<sup>+</sup>CD19<sup>+</sup> bone marrow cells from *LisI<sup>fllox/fllox</sup>* and *CD2-Cre LisI<sup>fllox/fllox</sup>* mice. Histogram bars  
835 represent the numbers of cells in each indicated subset from mice of the indicated genotype.  
836 Data are mean  $\pm$  S.D. and represent two independent experiments each including n=3-4 mice  
837 per group. Unpaired two-tailed Mann–Whitney t test were performed. \*P < 0.05; \*\*P < 0.01;  
838 \*\*\*P < 0.001; \*\*\*\*P < 0.0001.

839

840 **Figure 3 – Figure Supplement 1. Normal T cell development in *CD4-Cre LisI<sup>fllox/fllox</sup>* mice.**

841 Phenotypic analyses of thymocytes from *LisI<sup>fllox/fllox</sup>* and *CD4-Cre LisI<sup>fllox/fllox</sup>* mice. (A) Dot plots  
842 show CD4 versus CD8 surface staining on thymocytes from *LisI<sup>fllox/fllox</sup>* and *CD4-Cre LisI<sup>fllox/fllox</sup>*  
843 mice. Histogram bars represent the numbers of thymocytes in each indicated subset from mice  
844 of the indicated genotype. Data are mean  $\pm$  S.D. and represent two independent experiments  
845 each including n=2-3 mice per group. (B) Dot plots show CD24 versus TCR $\beta$  surface staining  
846 on CD4<sup>+</sup> SP and CD8<sup>+</sup> SP thymocytes from *LisI<sup>fllox/fllox</sup>* and *CD4-Cre LisI<sup>fllox/fllox</sup>* mice.  
847 Histogram bars represent the numbers of thymocytes in the indicated subset from mice of the  
848 indicated genotype. Data are mean  $\pm$  S.D. and represent two independent experiments each  
849 including n=2 mice per group. (C) Dot plots show CD4 versus CD8 surface staining on  
850 thymocytes from *LisI<sup>fllox/fllox</sup>* and *CD4-Cre LisI<sup>fllox/fllox</sup>* mice expressing the AND TCR transgene.  
851 Histogram graphs represent the TCR V $\alpha$ 11 surface staining on total thymocytes. Histogram  
852 bars represent the numbers of thymocytes in each indicated subset from mice of the indicated  
853 genotype. Data are mean  $\pm$  S.D. and represent two independent experiments each including  
854 n=2-3 mice per group. (D) Dot plots show TCR versus B220 and CD4 versus CD8 surface  
855 staining on total splenocytes and splenic T cells, respectively, from *LisI<sup>fllox/fllox</sup>* and *CD4-Cre*  
856 *LisI<sup>fllox/fllox</sup>* mice. Histogram bars represent the numbers of cells in each indicated subset from  
857 mice of the indicated genotype. Data are mean  $\pm$  S.D. and represent two independent

858 experiments each including n=2-3 mice per group. (E) Dot plots show CD4 versus CD8 surface  
859 staining on splenocytes from *Lis1<sup>fllox/+</sup>* and *CD4-Cre Lis1<sup>fllox/+</sup>* mice. Histogram bars represent  
860 the numbers of cells in each indicated subset from mice of the indicated genotype. Data are  
861 mean  $\pm$  S.D. and represent two independent experiments each including n=3-4 mice per group.  
862 \*P < 0.05; \*\*P < 0.01; \*\*\*P < 0.001; \*\*\*\*P < 0.0001.

863

864 **Figure 3 – Figure Supplement 2. Effect of LIS1 haploid and diploid deficiency on CD4+**  
865 **T-cell proliferation and expansion.** (A) CD4<sup>+</sup> T cells from *Lis1<sup>fllox/+</sup>* and *CD4-Cre Lis1<sup>fllox/+</sup>*  
866 were stained with CTV and stimulated with anti-CD3 and anti-CD28 antibodies for 48 hours.  
867 The histogram graphs show CTV dilution. Bar graphs represent the percentages of cells that  
868 divided at least one-time (Tot.) or that divided 1, 2 or 3 times (D1, D2, D3) as determined by  
869 flow cytometry at 72 hours after stimulation. Data are mean  $\pm$  S.D. and represent two  
870 independent experiments each including n=4 mice per group. (B) Total cytoplasmic extracts  
871 of CD4<sup>+</sup> and CD8<sup>+</sup> T cells from *Lis1<sup>fllox/fllox</sup>* and *CD4-Cre Lis1<sup>fllox/fllox</sup>* mice were analyzed by  
872 Western blotting with antibodies against LIS1 and GAPDH, the loading control. (C) Bar graphs  
873 represent the percentages and numbers of CD45.1+CD4<sup>+</sup> T cells as determined by flow  
874 cytometry at day seven after immunization. Data are mean  $\pm$  S.D. and are representative of one  
875 experiment including n=5 mice per group. \*\*P < 0.01.

876

877 **References**

878

- 879 1. Kreslavsky T, Gleimer M, Miyazaki M, Choi Y, Gagnon E, Murre C, et al. beta-  
880 Selection-induced proliferation is required for alphabeta T cell differentiation. *Immunity*.  
881 2012;37(5):840-53.
- 882 2. Penit C, Lucas B, Vasseur F. Cell expansion and growth arrest phases during the  
883 transition from precursor (CD4-8-) to immature (CD4+8+) thymocytes in normal and  
884 genetically modified mice. *J Immunol*. 1995;154(10):5103-13.
- 885 3. Ciofani M, Schmitt TM, Ciofani A, Michie AM, Cuburu N, Aublin A, et al. Obligatory  
886 role for cooperative signaling by pre-TCR and notch during thymocyte differentiation. *Journal*  
887 *of Immunology*. 2004;172(9):5230-9.
- 888 4. Maillard I, Tu L, Sambandam A, Yashiro-Ohtani Y, Millholland J, Keeshan K, et al.  
889 The requirement for Notch signaling at the beta-selection checkpoint in vivo is absolute and  
890 independent of the pre-T cell receptor. *The Journal of experimental medicine*.  
891 2006;203(10):2239-45.
- 892 5. Sprent J, Surh CD. Normal T cell homeostasis: the conversion of naive cells into  
893 memory-phenotype cells. *Nat Immunol*. 2011;12(6):478-84.
- 894 6. Foulds KE, Zenewicz LA, Shedlock DJ, Jiang J, Troy AE, Shen H. Cutting edge: CD4  
895 and CD8 T cells are intrinsically different in their proliferative responses. *Journal of*  
896 *Immunology*. 2002;168(4):1528-32.
- 897 7. Seder RA, Ahmed R. Similarities and differences in CD4(+) and CD8(+) effector and  
898 memory T cell generation. *Nature immunology*. 2003;4(9):835-42.
- 899 8. Chang JT, Palanivel VR, Kinjyo I, Schambach F, Intlekofer AM, Banerjee A, et al.  
900 Asymmetric T lymphocyte division in the initiation of adaptive immune responses. *Science*.  
901 2007;315(5819):1687-91.
- 902 9. Arsenio J, Kakaradov B, Metz PJ, Kim SH, Yeo GW, Chang JT. Early specification of  
903 CD8(+) T lymphocyte fates during adaptive immunity revealed by single-cell gene-expression  
904 analyses. *Nature immunology*. 2014;15(4):365-+.
- 905 10. Bird JJ, Brown DR, Mullen AC, Moskowitz NH, Mahowald MA, Sider JR, et al. Helper  
906 T cell differentiation is controlled by the cell cycle. *Immunity*. 1998;9(2):229-37.
- 907 11. Ben-Sasson SZ, Gerstel R, Hu-Li J, Paul WE. Cell division is not a "clock" measuring  
908 acquisition of competence to produce IFN-gamma or IL-4. *Journal of Immunology*.  
909 2001;166(1):112-20.
- 910 12. Chang JT, Ciocca ML, Kinjyo I, Palanivel VR, McClurkin CE, De Jong CS, et al.  
911 Asymmetric Proteasome Segregation as a Mechanism for Unequal Partitioning of the  
912 Transcription Factor T-bet during T Lymphocyte Division. *Immunity*. 2011;34(4):492-504.
- 913 13. Nish SA, Zens KD, Kratchmarov R, Lin WHW, Adams WC, Chen YH, et al. CD4(+)  
914 T cell effector commitment coupled to self-renewal by asymmetric cell divisions. *Journal of*  
915 *Experimental Medicine*. 2017;214(1):39-47.
- 916 14. Cobbold SP, Adams E, Howie D, Waldmann H. CD4(+) T Cell Fate Decisions Are  
917 Stochastic, Precede Cell Division, Depend on GITR Co-Stimulation, and Are Associated With  
918 Uropodium Development. *Frontiers in immunology*. 2018;9.
- 919 15. Markus SM, Marzo MG, McKenney RJ. New insights into the mechanism of dynein  
920 motor regulation by lissencephaly-1. *Elife*. 2020;9.
- 921 16. Yingling J, Youn YH, Darling D, Toyo-Oka K, Pramparo T, Hirotsune S, et al.  
922 Neuroepithelial stem cell proliferation requires LIS1 for precise spindle orientation and  
923 symmetric division. *Cell*. 2008;132(3):474-86.

- 924 17. Reiner O, Sapir T. LIS1 functions in normal development and disease. *Current opinion*  
925 *in neurobiology*. 2013;23(6):951-6.
- 926 18. Zimdahl B, Ito T, Blevins A, Bajaj J, Konuma T, Weeks J, et al. Lis1 regulates  
927 asymmetric division in hematopoietic stem cells and in leukemia. *Nature genetics*.  
928 2014;46(3):245-+.
- 929 19. Yamada M, Toba S, Yoshida Y, Haratani K, Mori D, Yano Y, et al. LIS1 and NDEL1  
930 coordinate the plus-end-directed transport of cytoplasmic dynein. *Embo Journal*.  
931 2008;27(19):2471-83.
- 932 20. Huang J, Roberts AJ, Leschziner AE, Reck-Peterson SL. Lis1 Acts as a "Clutch"  
933 between the ATPase and Microtubule-Binding Domains of the Dynein Motor. *Cell*.  
934 2012;150(5):975-86.
- 935 21. Htet ZM, Gillies JP, Baker RW, Leschziner AE, DeSantis ME, Reck-Peterson SL. LIS1  
936 promotes the formation of activated cytoplasmic dynein-1 complexes. *Nature cell biology*.  
937 2020;22(5):518-+.
- 938 22. Elshenawy MM, Kusakci E, Volz S, Baumbach J, Bullock SL, Yildiz A. Lis1 activates  
939 dynein motility by modulating its pairing with dynactin. *Nature cell biology*. 2020;22(5):570-  
940 8.
- 941 23. Wang S, Ketcham SA, Schon A, Goodman B, Wang Y, Yates J, 3rd, et al. Nudel/NudE  
942 and Lis1 promote dynein and dynactin interaction in the context of spindle morphogenesis.  
943 *Molecular biology of the cell*. 2013;24(22):3522-33.
- 944 24. McKenney RJ, Huynh W, Tanenbaum ME, Bhabha G, Vale RD. Activation of  
945 cytoplasmic dynein motility by dynactin-cargo adapter complexes. *Science*.  
946 2014;345(6194):337-41.
- 947 25. Ayloo S, Lazarus JE, Dodda A, Tokito M, Ostap EM, Holzbaur EL. Dynactin functions  
948 as both a dynamic tether and brake during dynein-driven motility. *Nat Commun*. 2014;5:4807.
- 949 26. Urnavicius L, Zhang K, Diamant AG, Motz C, Schlager MA, Yu M, et al. The structure  
950 of the dynactin complex and its interaction with dynein. *Science*. 2015;347(6229):1441-6.
- 951 27. Schlager MA, Hoang HT, Urnavicius L, Bullock SL, Carter AP. In vitro reconstitution  
952 of a highly processive recombinant human dynein complex. *EMBO J*. 2014;33(17):1855-68.
- 953 28. Young A, Dichtenberg JB, Purohit A, Tuft R, Doxsey SJ. Cytoplasmic dynein-mediated  
954 assembly of pericentrin and gamma tubulin onto centrosomes. *Molecular biology of the cell*.  
955 2000;11(6):2047-56.
- 956 29. Blagden SP, Glover DM. Polar expeditions--provisioning the centrosome for mitosis.  
957 *Nature cell biology*. 2003;5(6):505-11.
- 958 30. Quintyne NJ, Schroer TA. Distinct cell cycle-dependent roles for dynactin and dynein  
959 at centrosomes. *Journal of Cell Biology*. 2002;159(2):245-54.
- 960 31. Zvezdova E, Mikolajczak J, Garreau A, Marcellin M, Rigal L, Lee J, et al. Themis1  
961 enhances T cell receptor signaling during thymocyte development by promoting Vav1 activity  
962 and Grb2 stability. *Science signaling*. 2016;9(428):ra51.
- 963 32. Garreau A, Blaize G, Argenty J, Rouquie N, Tourdes A, Wood SA, et al. Grb2-Mediated  
964 Recruitment of USP9X to LAT Enhances Themis Stability following Thymic Selection. *J*  
965 *Immunol*. 2017;199(8):2758-66.
- 966 33. Moon HM, Youn YH, Pemble H, Yingling J, Wittmann T, Wynshaw-Boris A. LIS1  
967 controls mitosis and mitotic spindle organization via the LIS1-NDEL1-dynein complex. *Hum*  
968 *Mol Genet*. 2014;23(2):449-66.
- 969 34. Ngoi SM, Lopez JM, Chang JT. The Microtubule-Associated Protein Lis1 Regulates T  
970 Lymphocyte Homeostasis and Differentiation. *J Immunol*. 2016.
- 971 35. Greaves DR, Wilson FD, Lang G, Kioussis D. Human CD2 3'-flanking sequences confer  
972 high-level, T cell-specific, position-independent gene expression in transgenic mice. *Cell*.  
973 1989;56(6):979-86.

- 974 36. Boudil A, Matei IR, Shih HY, Bogdanoski G, Yuan JS, Chang SG, et al. IL-7  
975 coordinates proliferation, differentiation and TcrA recombination during thymocyte beta-  
976 selection. *Nature immunology*. 2015;16(4):397-405.
- 977 37. Azzam HS, Grinberg A, Lui K, Shen H, Shores EW, Love PE. CD5 expression is  
978 developmentally regulated by T cell receptor (TCR) signals and TCR avidity. *Journal of*  
979 *Experimental Medicine*. 1998;188(12):2301-11.
- 980 38. Taghon T, Yui MA, Pant R, Diamond RA, Rothenberg EV. Developmental and  
981 molecular characterization of emerging beta- and gammadelta-selected pre-T cells in the adult  
982 mouse thymus. *Immunity*. 2006;24(1):53-64.
- 983 39. Ciofani M, Zuniga-Pflucker JC. Notch promotes survival of pre-T cells at the beta-  
984 selection checkpoint by regulating cellular metabolism. *Nature immunology*. 2005;6(9):881-8.
- 985 40. Kelly AP, Finlay DK, Hinton HJ, Clarke RG, Fiorini E, Radtke F, et al. Notch-induced  
986 T cell development requires phosphoinositide-dependent kinase 1. *Embo J*. 2007;26(14):3441-  
987 50.
- 988 41. Schmitt TM, de Pooter RF, Gronski MA, Cho SK, Ohashi PS, Zuniga-Pflucker JC.  
989 Induction of T cell development and establishment of T cell competence from embryonic stem  
990 cells differentiated in vitro. *Nature immunology*. 2004;5(4):410-7.
- 991 42. Akashi K, Kondo M, von Freeden-Jeffry U, Murray R, Weissman IL. Bcl-2 rescues T  
992 lymphopoiesis in interleukin-7 receptor-deficient mice. *Cell*. 1997;89(7):1033-41.
- 993 43. Maraskovsky E, O'Reilly LA, Teepe M, Corcoran LM, Peschon JJ, Strasser A. Bcl-2  
994 can rescue T lymphocyte development in interleukin-7 receptor-deficient mice but not in  
995 mutant rag-1(-/-) mice. *Cell*. 1997;89(7):1011-9.
- 996 44. Kasthuber ER, Lowe SW. Putting p53 in Context. *Cell*. 2017;170(6):1062-78.
- 997 45. Nigg EA, Stearns T. The centrosome cycle: Centriole biogenesis, duplication and  
998 inherent asymmetries. *Nature cell biology*. 2011;13(10):1154-60.
- 999 46. Holland AJ, Cleveland DW. Boveri revisited: chromosomal instability, aneuploidy and  
1000 tumorigenesis. *Nature reviews Molecular cell biology*. 2009;10(7):478-87.
- 1001 47. Maiato H, Logarinho E. Mitotic spindle multipolarity without centrosome amplification.  
1002 *Nature cell biology*. 2014;16(5):386-U23.
- 1003 48. Reck-Peterson SL, Redwine WB, Vale RD, Carter AP. The cytoplasmic dynein  
1004 transport machinery and its many cargoes (vol 19, pg 382, 2018). *Nat Rev Mol Cell Bio*.  
1005 2018;19(7):479-.
- 1006 49. Jung HR, Song KH, Chang JT, Doh J. Geometrically Controlled Asymmetric Division  
1007 of CD4+T Cells Studied by Immunological Synapse Arrays. *PloS one*. 2014;9(3).
- 1008 50. Daum JR, Potapova TA, Sivakumar S, Daniel JJ, Flynn JN, Rankin S, et al. Cohesion  
1009 Fatigue Induces Chromatid Separation in Cells Delayed at Metaphase. *Current Biology*.  
1010 2011;21(12):1018-24.
- 1011 51. Faulkner NE, Dujardin DL, Tai CY, Vaughan KT, O'Connell CB, Wangs YL, et al. A  
1012 role for the lissencephaly gene LIS1 in mitosis and cytoplasmic dynein function. *Nature cell*  
1013 *biology*. 2000;2(11):784-91.
- 1014 52. Cimini D, Howell B, Maddox P, Khodjakov A, Degrossi F, Salmon ED. Merotelic  
1015 kinetochore orientation is a major mechanism of aneuploidy in mitotic mammalian tissue cells.  
1016 *Journal of Cell Biology*. 2001;153(3):517-27.
- 1017 53. Barenz F, Mayilo D, Gruss OJ. Centriolar satellites: Busy orbits around the centrosome.  
1018 *European Journal of Cell Biology*. 2011;90(12):983-9.
- 1019 54. Dammermann A, Merdes A. Assembly of centrosomal proteins and microtubule  
1020 organization depends on PCM-1. *Journal of Cell Biology*. 2002;159(2):255-66.
- 1021 55. Krauss SW, Spence JR, Bahmanyar S, Barth AIM, Go MM, Czerwinski D, et al.  
1022 Downregulation of protein 4.1R, a mature centriole protein, disrupts centrosomes, alters cell

- 1023 cycle progression, and perturbs mitotic spindles and anaphase. *Molecular and cellular biology*.  
1024 2008;28(7):2283-94.
- 1025 56. Kim K, Rhee K. The pericentriolar satellite protein CEP90 is crucial for integrity of the  
1026 mitotic spindle pole. *Journal of cell science*. 2011;124(Pt 3):338-47.
- 1027 57. Fu G, Vallee S, Rybakin V, McGuire MV, Ampudia J, Brockmeyer C, et al. Themis  
1028 controls thymocyte selection through regulation of T cell antigen receptor-mediated signaling.  
1029 *Nature immunology*. 2009;10(8):848-56.
- 1030 58. Lesourne R, Uehara S, Lee J, Song KD, Li L, Pinkhasov J, et al. Themis, a T cell-  
1031 specific protein important for late thymocyte development. *Nature immunology*.  
1032 2009;10(8):840-7.
- 1033 59. Johnson AL, Aravind L, Shulzhenko N, Morgun A, Choi SY, Crockford TL, et al.  
1034 Themis is a member of a new metazoan gene family and is required for the completion of  
1035 thymocyte positive selection. *Nature immunology*. 2009;10(8):831-9.
- 1036 60. Brzostek J, Gautam N, Zhao X, Chen EW, Mehta M, Tung DWH, et al. T cell receptor  
1037 and cytokine signal integration in CD8(+) T cells is mediated by the protein Themis. *Nature*  
1038 *immunology*. 2020;21(2):186-+.
- 1039 61. Choi S, Warzecha C, Zvezdova E, Lee J, Argenty J, Lesourne R, et al. THEMIS  
1040 enhances TCR signaling and enables positive selection by selective inhibition of the  
1041 phosphatase SHP-1. *Nature immunology*. 2017.
- 1042 62. Liu X, Zheng H, Li X, Wang S, Meyerson HJ, Yang W, et al. Gain-of-function  
1043 mutations of Ptpn11 (Shp2) cause aberrant mitosis and increase susceptibility to DNA damage-  
1044 induced malignancies. *Proceedings of the National Academy of Sciences of the United States*  
1045 *of America*. 2016;113(4):984-9.
- 1046 63. Li XL, Liu LS, Li R, Wu AL, Lu JQ, Wu QZ, et al. Hepatic loss of Lissencephaly 1  
1047 (Lis1) induces fatty liver and accelerates liver tumorigenesis in mice. *Journal of Biological*  
1048 *Chemistry*. 2018;293(14):5160-71.
- 1049 64. Xing Z, Tang X, Gao Y, Da L, Song H, Wang SQ, et al. The human LIS1 is  
1050 downregulated in hepatocellular carcinoma and plays a tumor suppressor function. *Biochem*  
1051 *Bioph Res Co*. 2011;409(2):193-9.
- 1052 65. Messi E, Florian MC, Caccia C, Zanisi M, Maggi R. Retinoic acid reduces human  
1053 neuroblastoma cell migration and invasiveness: effects on DCX, LIS1, neurofilaments-68 and  
1054 vimentin expression. *Bmc Cancer*. 2008;8.
- 1055 66. Suzuki SO, McKenney RJ, Mawatari S, Mizuguchi M, Mikami A, Iwaki T, et al.  
1056 Expression patterns of LIS1, dynein and their interaction partners dynactin, NudE, NudEL and  
1057 NudC in human gliomas suggest roles in invasion and proliferation. *Acta Neuropathol*.  
1058 2007;113(5):591-9.
- 1059 67. Yang R, Chen YJ, Tang C, Li HB, Wang B, Yan Q, et al. MicroRNA-144 suppresses  
1060 cholangiocarcinoma cell proliferation and invasion through targeting platelet activating factor  
1061 acetylhydrolase isoform 1b. *Bmc Cancer*. 2014;14.
- 1062 68. Cao SY, Lu XM, Wang LH, Qian XF, Jin GF, Ma HX. The functional polymorphisms  
1063 of LIS1 are associated with acute myeloid leukemia risk in a Han Chinese population. *Leukemia*  
1064 *Res*. 2017;54:7-11.
- 1065 69. Hirotsume S, Fleck MW, Gambello MJ, Bix GJ, Chen A, Clark GD, et al. Graded  
1066 reduction of Pafah1b1 (Lis1) activity results in neuronal migration defects and early embryonic  
1067 lethality. *Nature genetics*. 1998;19(4):333-9.
- 1068

**Figure 1**

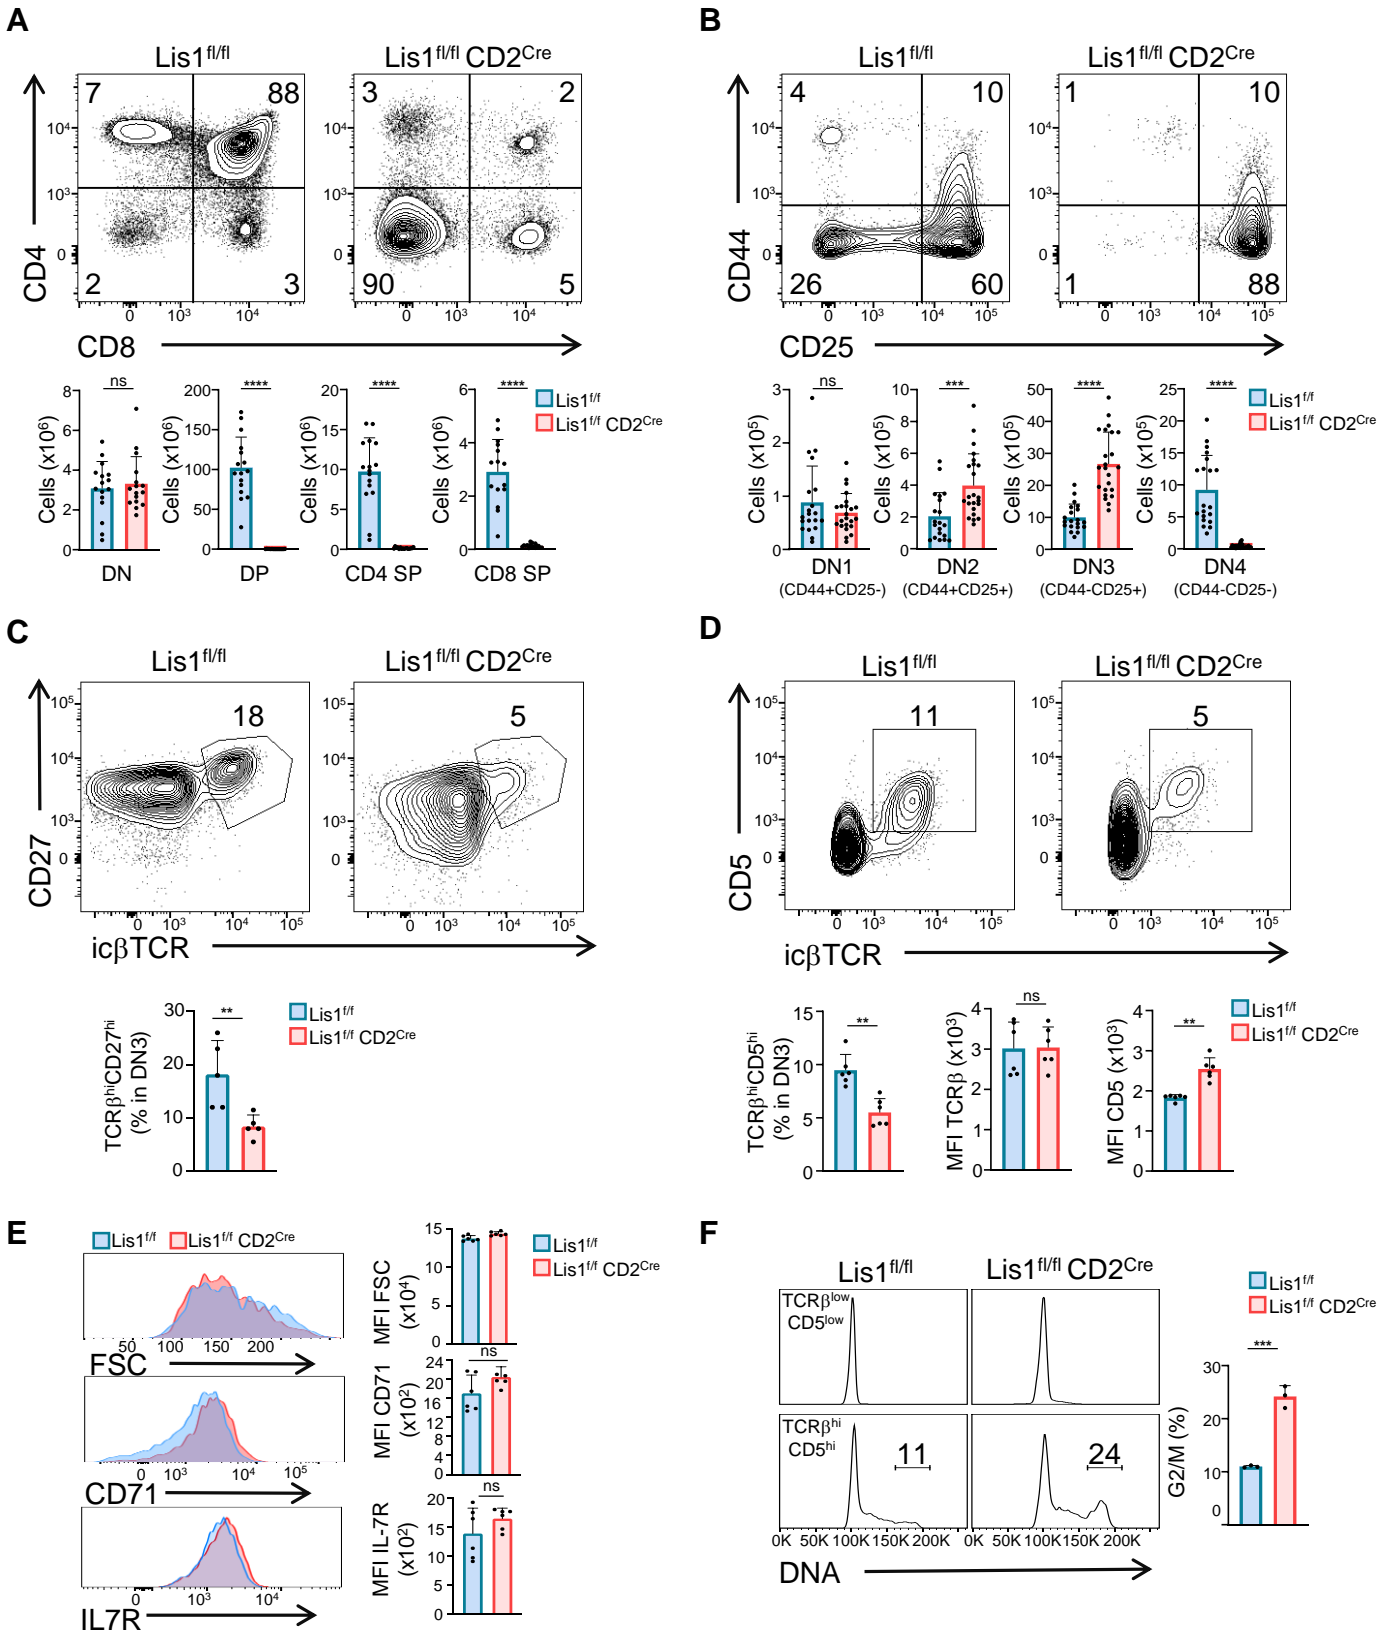



**Figure 1 - Figure Supplement 1**

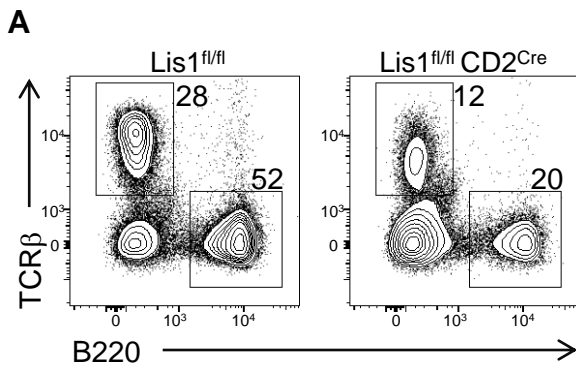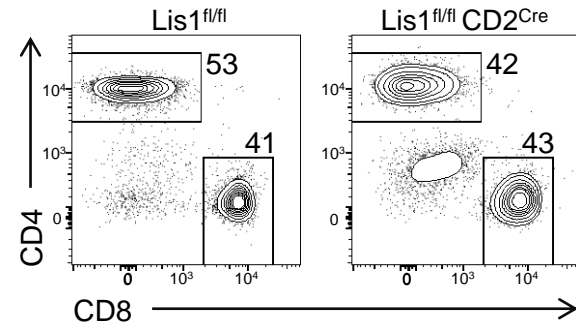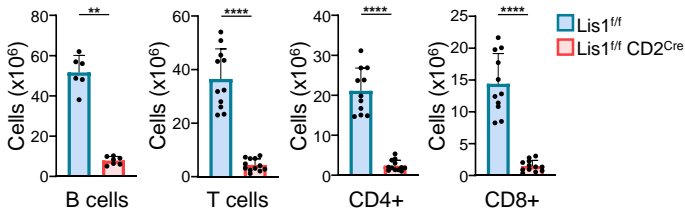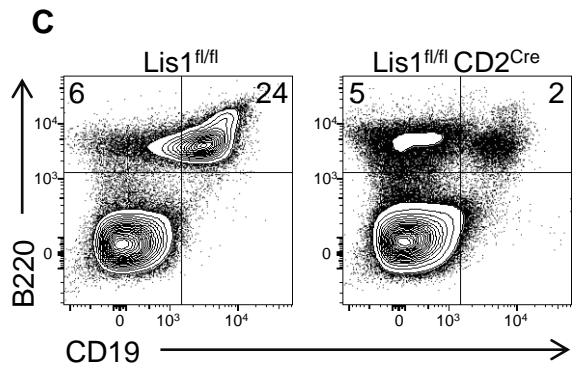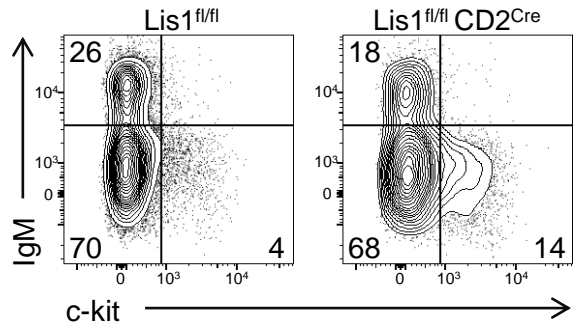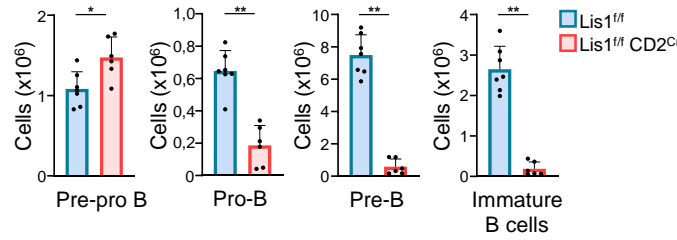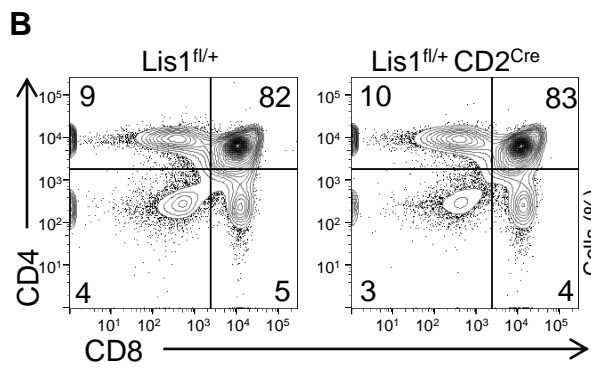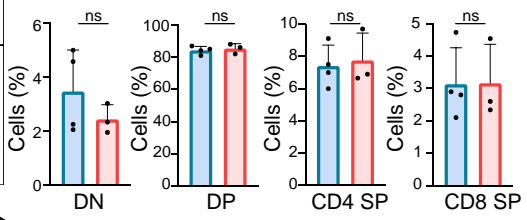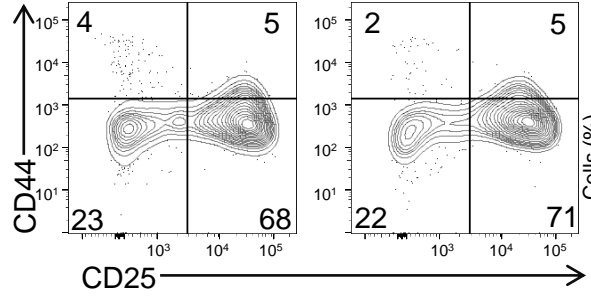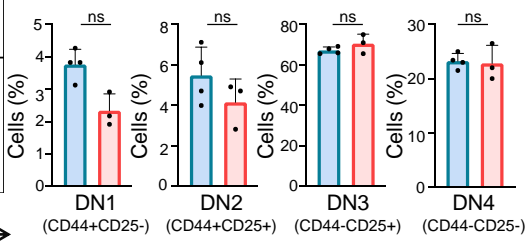

**Figure 2**

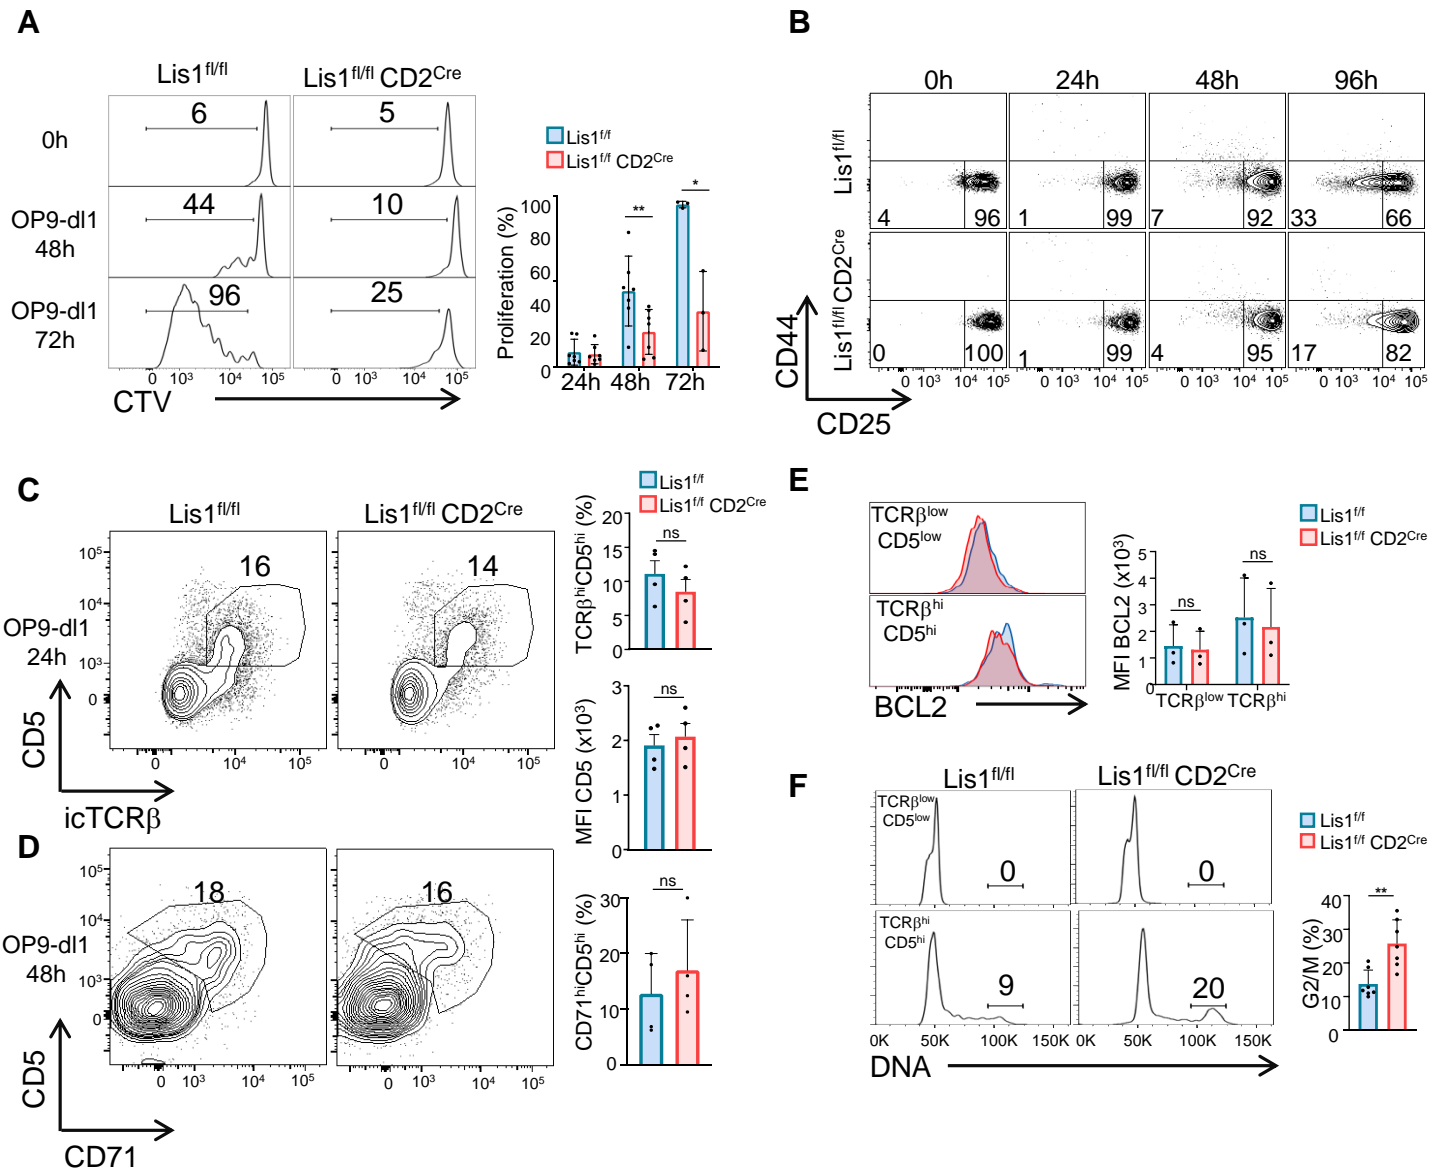

**Figure 3**

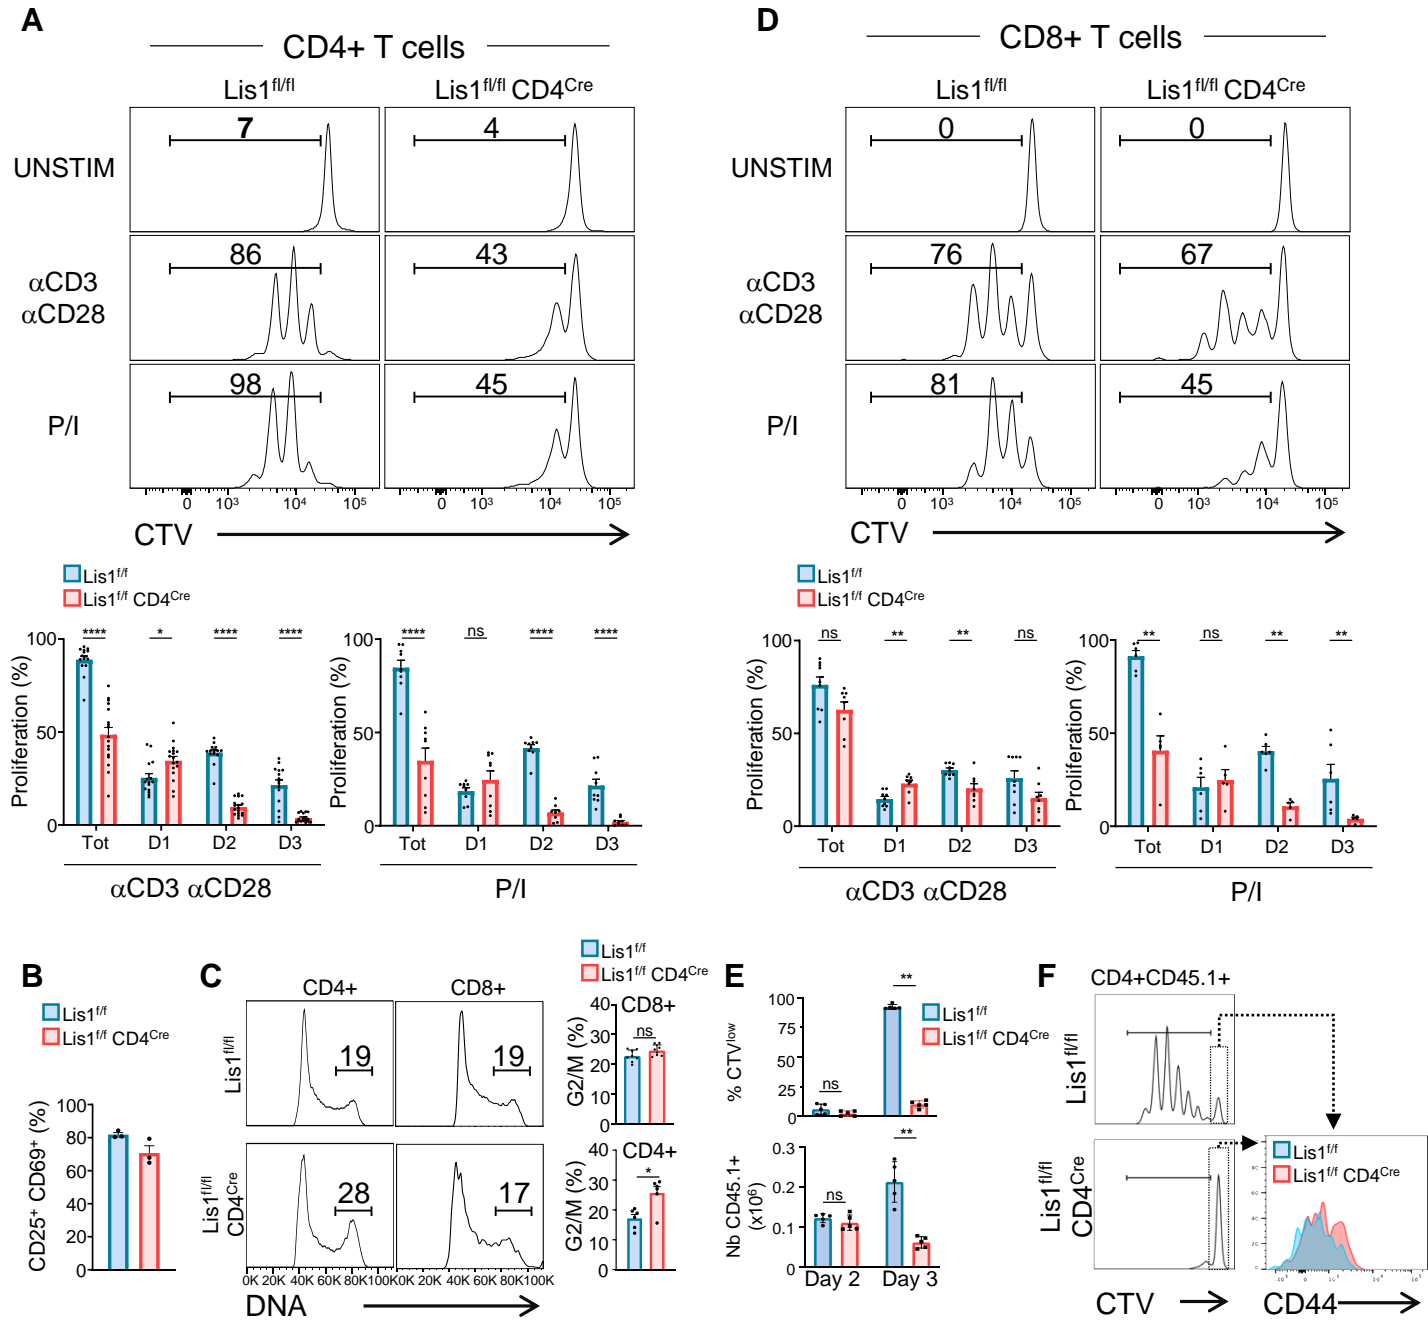

**Figure 3 - Figure Supplement 1**

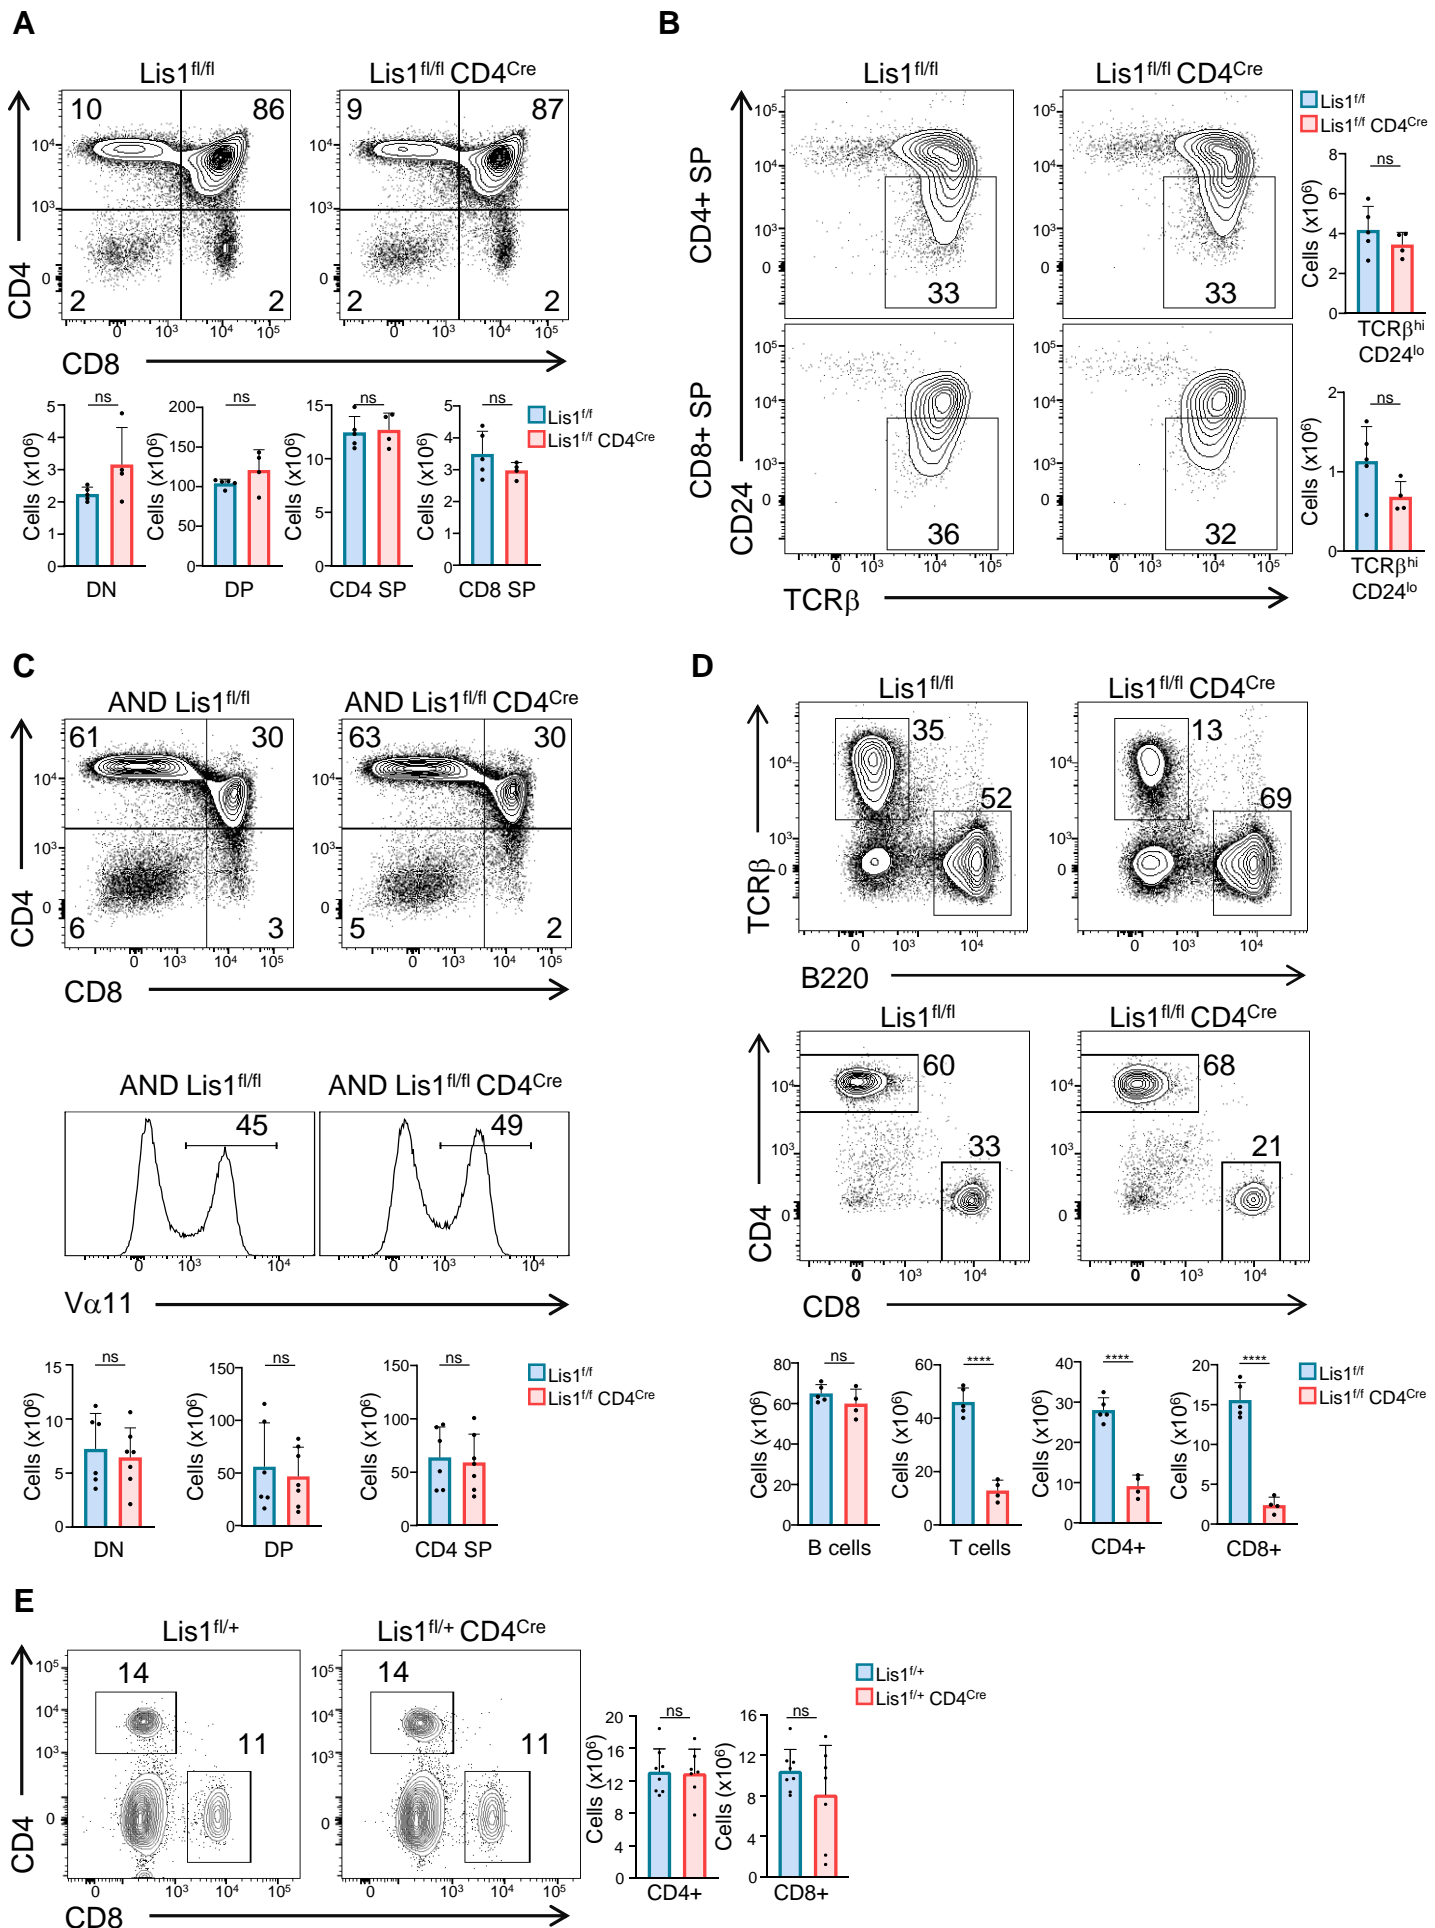

**Figure 3 - Figure Supplement 2**

**A**

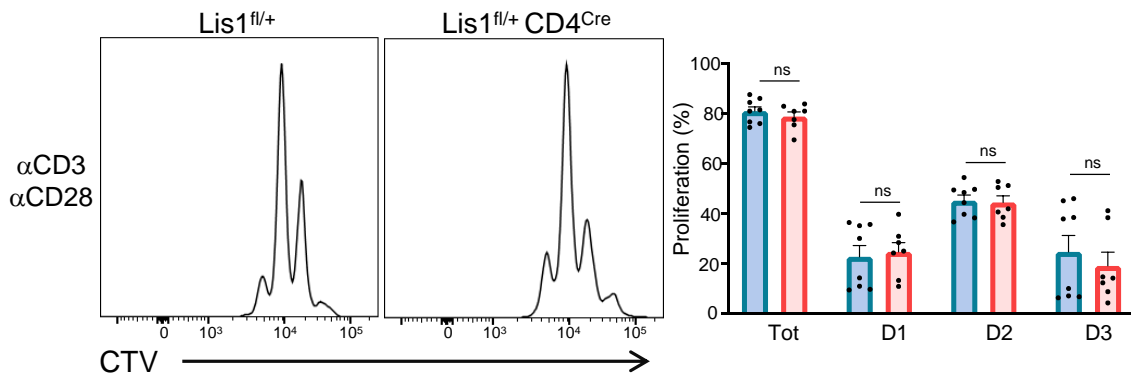

**B**

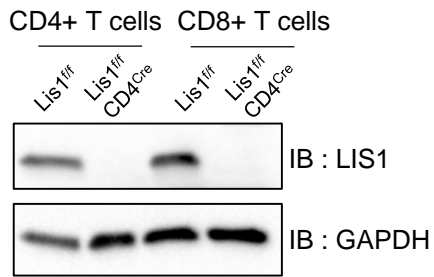

**C**

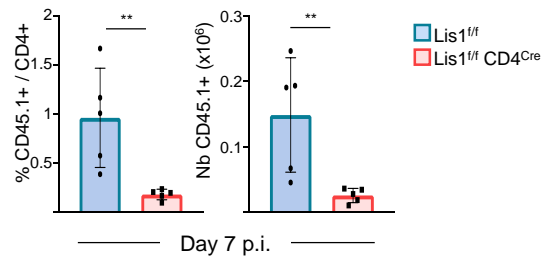

**Figure 4**

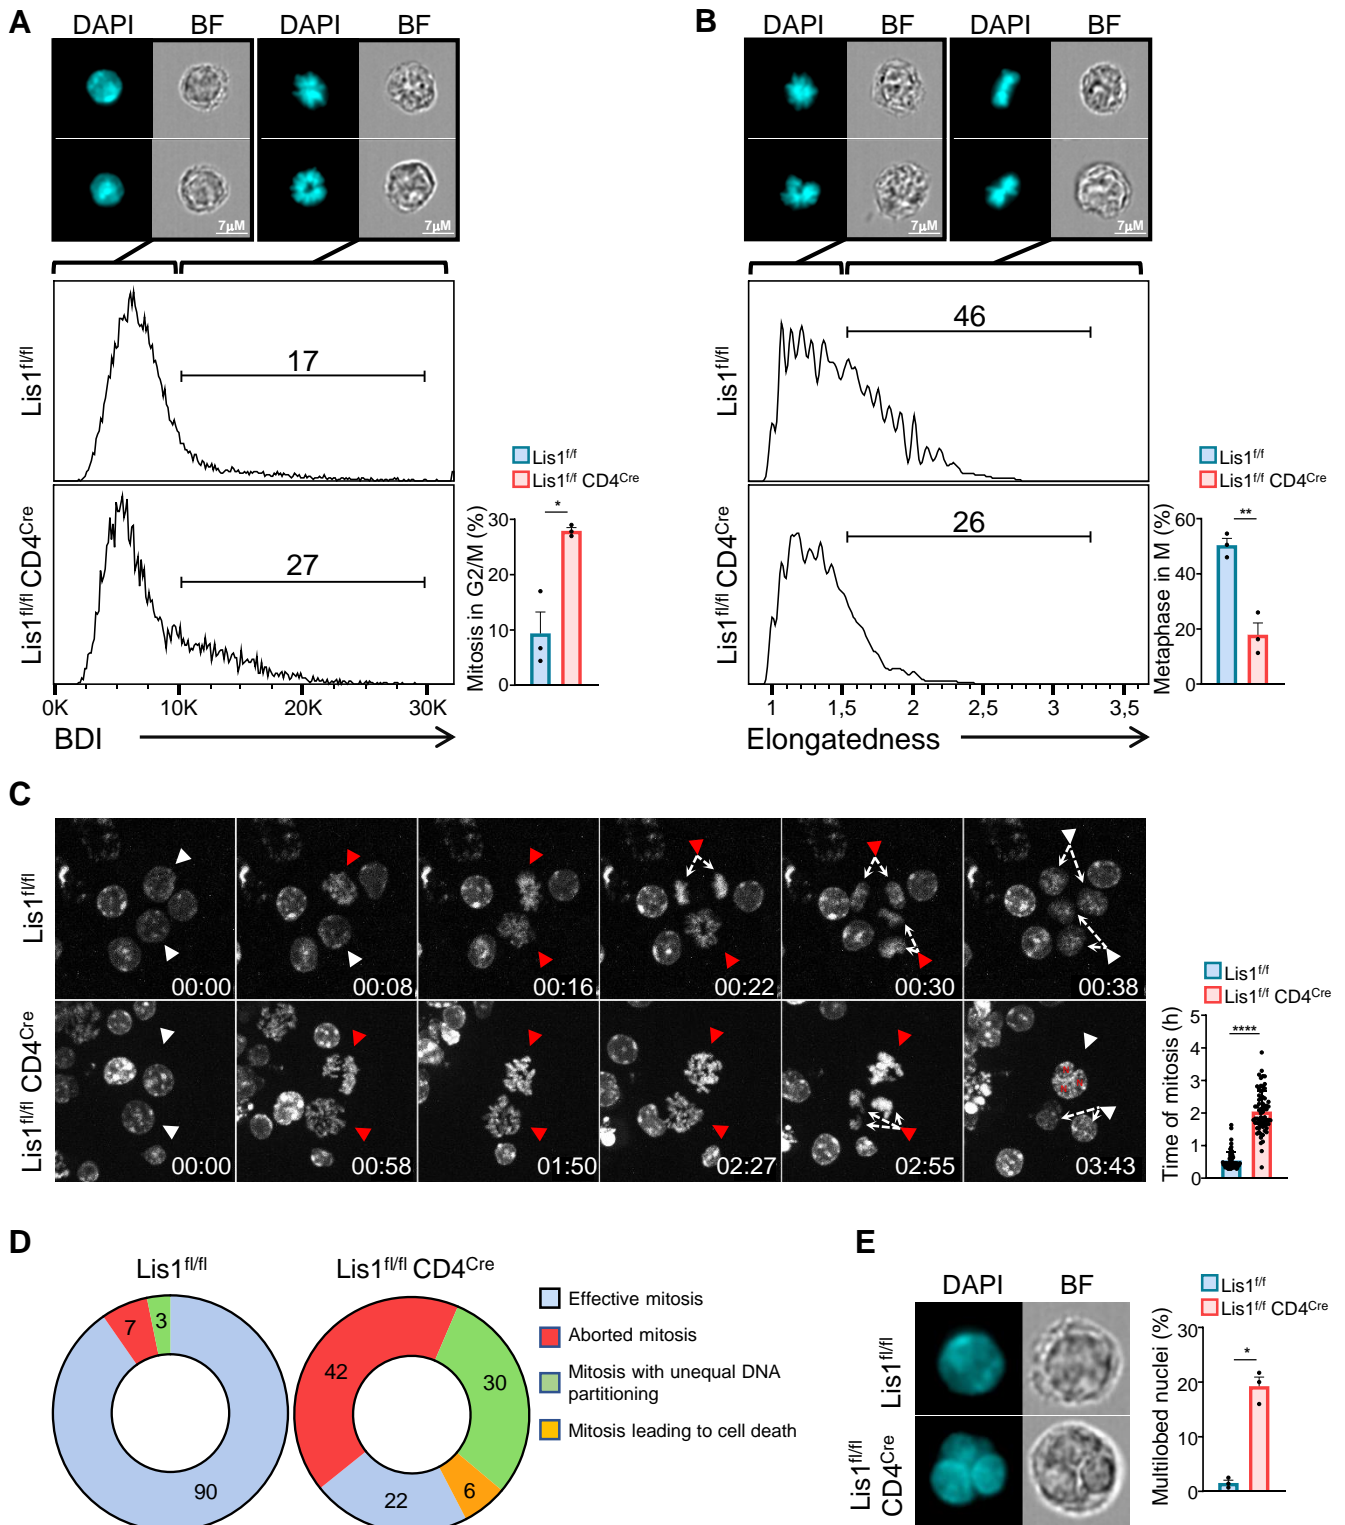

**Figure 5**

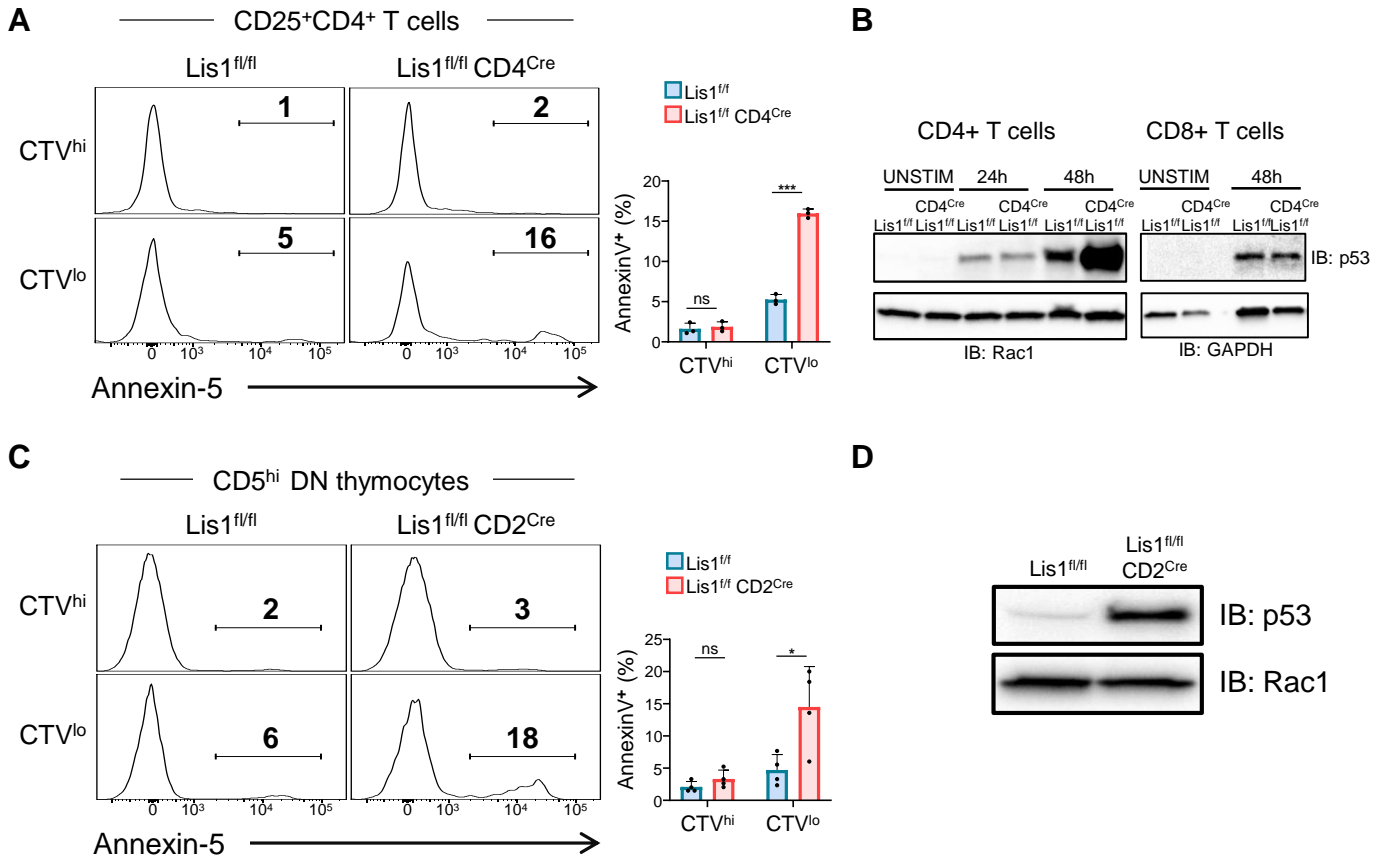

**Figure 6**

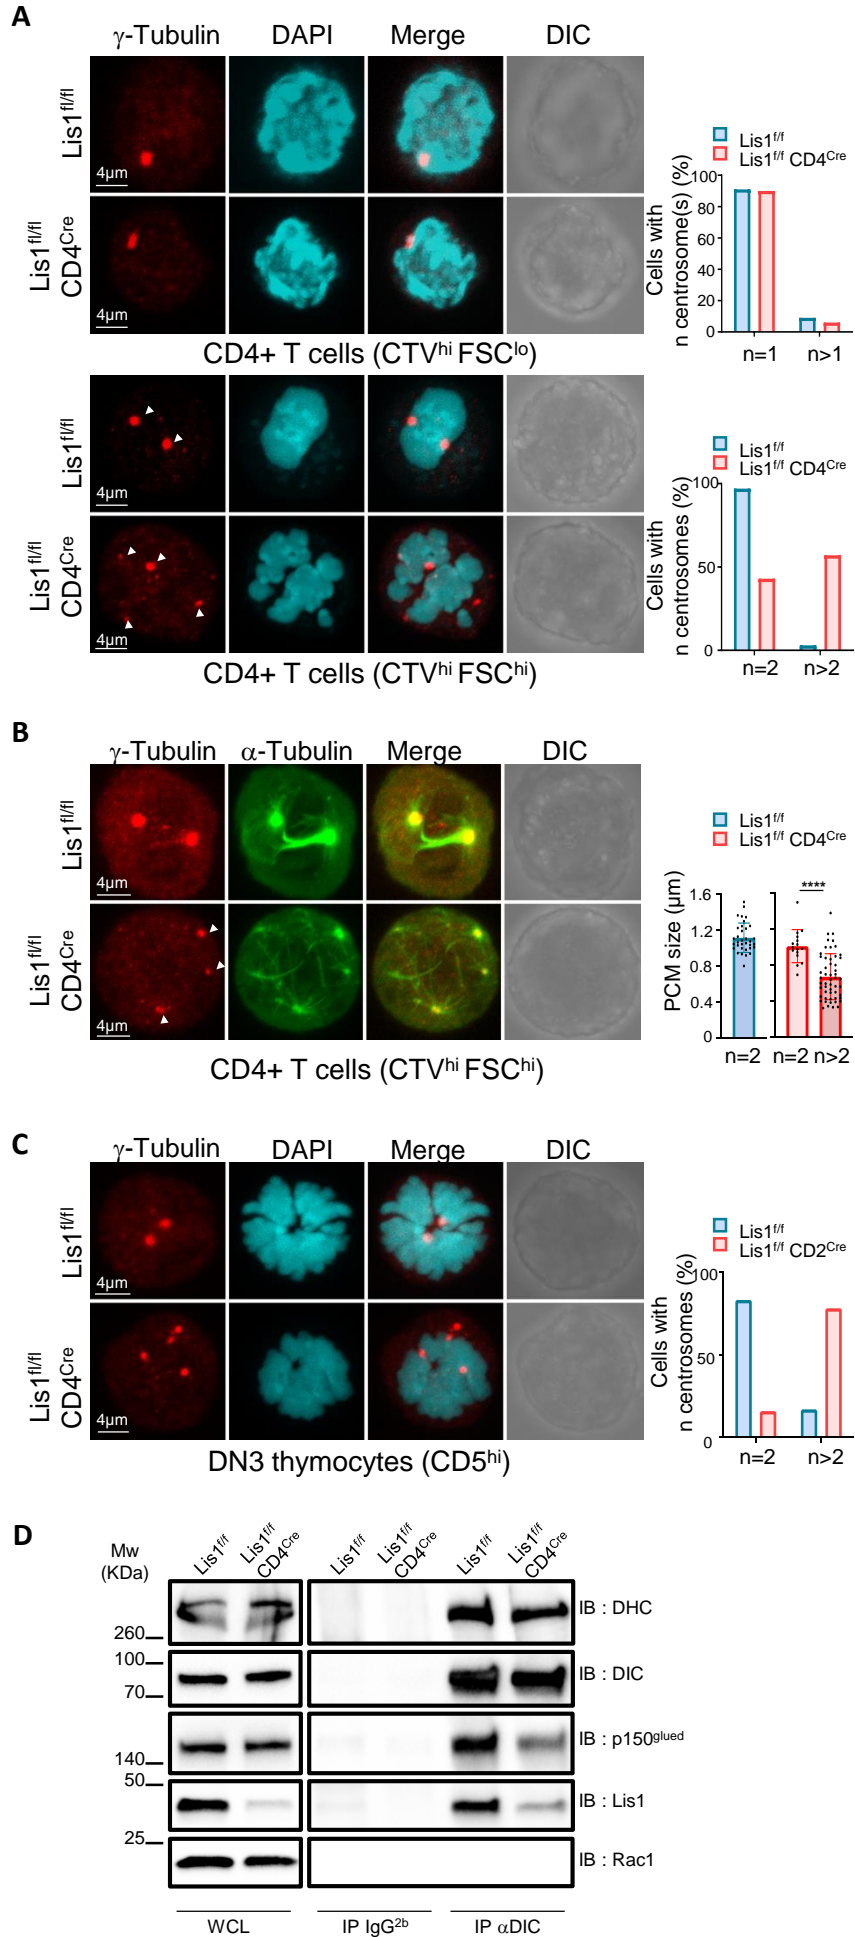

Source: https://www.biorxiv.org/content/10.1101/2022.05.23.493045v2.full.pdf
